# Supplementary material for: Design of supramolecular systems capable of recognizing anions uniquely by aliphatic C–H⋯anion hydrogen bonds: theoretical insights
Source: Royal Society of Chemistry journal article supplement (doi:10.1039/d1nj03320d), 2021-01-01
Supplement: d1nj03320d1.pdf [file d1nj03320d1.pdf]

ARTICLE

## Design of Supramolecular Systems Capable of Recognizing Anions Uniquely by Aliphatic C–H<sup>δ+</sup> Anion Hydrogen Bonds: Theoretical Insights

Renato Pereira Orenha,<sup>\*a</sup> Claudia Haber Cintra,<sup>a</sup> Maria Laura Lucas Natal,<sup>a</sup> Matheus Cachoeira Colaço,<sup>b</sup> Giovanni Finoto Caramori,<sup>b</sup> Maurício Jeomar Piotrowski<sup>c</sup> and Renato Luis Tame Parreira<sup>\*a</sup>

### Supplementary Material

<sup>a</sup> Núcleo de Pesquisas em Ciências Exatas e Tecnológicas, Universidade de Franca, Franca, SP, Brazil. E-mail: rpo9@hotmail.com / renato.parreira@unifran.edu.br.

<sup>b</sup> Departamento de Química, Universidade Federal de Santa Catarina, Campus Universitário Trindade, CP 476, Florianópolis, SC, 88040–900, Brazil.

<sup>c</sup> Department of Physics, Federal University of Pelotas, PO Box 354, 96010-900, Pelotas, RS, Brazil.

**Table S1.** Optimized Cartesian coordinates for the compounds investigated in this study.

| Complex |           | 1 <sup>+</sup> -Cl <sup>-</sup> – B97D3/6–31+G(d) + PCM(acetonitrile) |           |  |
|---------|-----------|-----------------------------------------------------------------------|-----------|--|
| Atom    | X         | Y                                                                     | Z         |  |
| C       | -0.519791 | 0.091022                                                              | -2.535164 |  |
| O       | -1.622414 | -0.511755                                                             | -1.856519 |  |
| O       | 0.704181  | -0.182887                                                             | -1.852130 |  |
| C       | -1.684879 | 0.004850                                                              | -0.526201 |  |
| C       | 0.616459  | 0.329305                                                              | -0.521750 |  |
| O       | -0.473746 | -0.270785                                                             | 0.179148  |  |
| H       | -0.674356 | 1.183387                                                              | -2.592983 |  |
| H       | -0.452803 | -0.368823                                                             | -3.524430 |  |
| H       | -2.491958 | -0.519978                                                             | -0.008735 |  |
| H       | -1.851670 | 1.096258                                                              | -0.561402 |  |
| H       | 0.475567  | 1.424581                                                              | -0.555900 |  |
| H       | 1.535263  | 0.047591                                                              | -0.001164 |  |
| Cl      | -1.127427 | 3.943198                                                              | -1.298249 |  |
| Complex |           | 1 <sup>+</sup> -Cl <sup>-</sup> – ZORA-BLYP-D3(BJ)/TZ2P               |           |  |
| Atom    | X         | Y                                                                     | Z         |  |
| C       | -0.527608 | 0.133667                                                              | -2.538080 |  |
| O       | -1.631958 | -0.495656                                                             | -1.861043 |  |
| O       | 0.707820  | -0.158530                                                             | -1.856947 |  |
| C       | -1.693315 | 0.041010                                                              | -0.525195 |  |
| C       | 0.610819  | 0.370833                                                              | -0.520695 |  |
| O       | -0.476237 | -0.255364                                                             | 0.186714  |  |
| H       | -0.684972 | 1.223984                                                              | -2.569356 |  |
| H       | -0.460085 | -0.320866                                                             | -3.529531 |  |
| H       | -2.500908 | -0.482797                                                             | -0.008011 |  |
| H       | -1.840294 | 1.132579                                                              | -0.570264 |  |
| H       | 0.445869  | 1.459665                                                              | -0.564071 |  |
| H       | 1.531443  | 0.094349                                                              | -0.000905 |  |
| Cl      | -1.048148 | 3.523092                                                              | -1.298096 |  |
| Complex |           | 1 <sup>+</sup> -Br <sup>-</sup> – B97D3/6–31+G(d) + PCM(acetonitrile) |           |  |
| Atom    | X         | Y                                                                     | Z         |  |
| C       | -0.525350 | 0.106312                                                              | -2.533300 |  |
| O       | -1.624243 | -0.507295                                                             | -1.855532 |  |
| O       | 0.701196  | -0.168395                                                             | -1.852498 |  |
| C       | -1.687869 | 0.009838                                                              | -0.524389 |  |
| C       | 0.611230  | 0.344663                                                              | -0.521308 |  |
| O       | -0.474818 | -0.265514                                                             | 0.179941  |  |
| H       | -0.684488 | 1.197918                                                              | -2.578707 |  |
| H       | -0.458051 | -0.346069                                                             | -3.526170 |  |
| H       | -2.494557 | -0.515423                                                             | -0.006402 |  |
| H       | -1.852537 | 1.100896                                                              | -0.561256 |  |
| H       | 0.458080  | 1.437386                                                              | -0.557819 |  |
| H       | 1.532845  | 0.071050                                                              | -0.001000 |  |
| Br      | -1.062289 | 3.847760                                                              | -1.328639 |  |
| Complex |           | 1 <sup>+</sup> -Br <sup>-</sup> – ZORA-BLYP-D3(BJ)/TZ2P               |           |  |
| Atom    | X         | Y                                                                     | Z         |  |
| C       | -0.527201 | 0.121485                                                              | -2.536537 |  |
| O       | -1.631017 | -0.506643                                                             | -1.859441 |  |
| O       | 0.707788  | -0.167581                                                             | -1.856192 |  |
| C       | -1.691879 | 0.025382                                                              | -0.523526 |  |
| C       | 0.611469  | 0.359264                                                              | -0.520472 |  |
| O       | -0.474841 | -0.265622                                                             | 0.187465  |  |
| H       | -0.685179 | 1.211935                                                              | -2.572740 |  |
| H       | -0.460228 | -0.330538                                                             | -3.528825 |  |
| H       | -2.498990 | -0.498294                                                             | -0.006024 |  |
| H       | -1.846705 | 1.116156                                                              | -0.564460 |  |
| H       | 0.450062  | 1.449107                                                              | -0.561409 |  |
| H       | 1.532704  | 0.086008                                                              | -0.000706 |  |
| Br      | -1.046835 | 3.712469                                                              | -1.324211 |  |

| Complex |           | 1 <sup>••</sup> NO <sub>2</sub> <sup>-</sup> – B97D3/6–31+G(d) + PCM(acetonitrile) |           |  |
|---------|-----------|------------------------------------------------------------------------------------|-----------|--|
| Atom    | X         | Y                                                                                  | Z         |  |
| C       | -0.206286 | -0.177618                                                                          | -2.456176 |  |
| O       | -1.505836 | -0.576674                                                                          | -2.019198 |  |
| O       | 0.785051  | -0.556704                                                                          | -1.499446 |  |
| C       | -1.784627 | 0.047285                                                                           | -0.765770 |  |
| C       | 0.484576  | 0.067191                                                                           | -0.251548 |  |
| O       | -0.809097 | -0.321001                                                                          | 0.210648  |  |
| H       | -0.181080 | 0.917568                                                                           | -2.598937 |  |
| H       | 0.008547  | -0.718337                                                                          | -3.381466 |  |
| H       | -2.750621 | -0.329474                                                                          | -0.419800 |  |
| H       | -1.790899 | 1.144699                                                                           | -0.892374 |  |
| H       | 0.524227  | 1.164659                                                                           | -0.369531 |  |
| H       | 1.214367  | -0.290915                                                                          | 0.479068  |  |
| O       | 0.444279  | 3.464623                                                                           | -2.072314 |  |
| N       | -0.444375 | 3.860846                                                                           | -1.252651 |  |
| O       | -1.652548 | 3.671866                                                                           | -1.605134 |  |
| Complex |           | 1 <sup>••</sup> NO <sub>2</sub> <sup>-</sup> – ZORA–BLYP–D3(BJ)/TZ2P               |           |  |
| Atom    | X         | Y                                                                                  | Z         |  |
| C       | -0.204275 | -0.128748                                                                          | -2.475468 |  |
| O       | -1.511862 | -0.531446                                                                          | -2.034405 |  |
| O       | 0.791945  | -0.540119                                                                          | -1.515133 |  |
| C       | -1.777337 | 0.142020                                                                           | -0.789737 |  |
| C       | 0.498444  | 0.127615                                                                           | -0.276085 |  |
| O       | -0.804005 | -0.245585                                                                          | 0.205302  |  |
| H       | -0.163452 | 0.967366                                                                           | -2.590916 |  |
| H       | 0.004818  | -0.668401                                                                          | -3.401947 |  |
| H       | -2.748072 | -0.211160                                                                          | -0.434441 |  |
| H       | -1.753259 | 1.232942                                                                           | -0.948564 |  |
| H       | 0.546174  | 1.216137                                                                           | -0.434150 |  |
| H       | 1.225640  | -0.224078                                                                          | 0.459526  |  |
| O       | 0.439126  | 3.108428                                                                           | -1.849426 |  |
| N       | -0.514978 | 3.807419                                                                           | -1.341453 |  |
| O       | -1.693231 | 3.315624                                                                           | -1.467731 |  |
| Complex |           | 2 <sup>••</sup> Cl <sup>-</sup> – B97D3/6–31+G(d) + PCM(acetonitrile)              |           |  |
| Atom    | X         | Y                                                                                  | Z         |  |
| C       | -0.340346 | -0.039049                                                                          | -2.699516 |  |
| O       | -1.118977 | -0.880408                                                                          | -1.853916 |  |
| O       | 0.539329  | 0.790826                                                                           | -1.905184 |  |
| C       | -1.579738 | -0.143006                                                                          | -0.717000 |  |
| C       | 0.772831  | 0.340900                                                                           | -0.572398 |  |
| O       | -0.469816 | 0.157466                                                                           | 0.144682  |  |
| C       | 1.640375  | -0.914027                                                                          | -0.463476 |  |
| C       | 0.405604  | -0.896711                                                                          | -3.707388 |  |
| C       | -2.580616 | -0.981142                                                                          | 0.050164  |  |
| H       | -1.001473 | 0.684206                                                                           | -3.207622 |  |
| H       | -2.023230 | 0.803619                                                                           | -1.072415 |  |
| H       | 1.278708  | 1.188119                                                                           | -0.090668 |  |
| H       | 1.125020  | -1.794119                                                                          | -0.863633 |  |
| H       | 2.585753  | -0.762755                                                                          | -1.004238 |  |
| H       | 1.870210  | -1.096092                                                                          | 0.596309  |  |
| H       | -0.315431 | -1.438524                                                                          | -4.336150 |  |
| H       | 1.014691  | -0.249914                                                                          | -4.352962 |  |
| H       | 1.060052  | -1.620237                                                                          | -3.206647 |  |
| H       | -3.471610 | -1.156468                                                                          | -0.567947 |  |
| H       | -2.133846 | -1.945464                                                                          | 0.328953  |  |
| H       | -2.884213 | -0.450373                                                                          | 0.962433  |  |
| Cl      | -3.225865 | 3.371902                                                                           | -2.034952 |  |
| Complex |           | 2 <sup>••</sup> Cl <sup>-</sup> – ZORA–BLYP–D3(BJ)/TZ2P                            |           |  |
| Atom    | X         | Y                                                                                  | Z         |  |
| C       | -0.328485 | 0.101780                                                                           | -2.630217 |  |
| O       | -1.082732 | -0.768097                                                                          | -1.788378 |  |

| ARTICLE |                                                                                      |           |           | Journal Name |
|---------|--------------------------------------------------------------------------------------|-----------|-----------|--------------|
| O       |                                                                                      | 0.737510  | 0.747845  | -1.844593    |
| C       |                                                                                      | -1.516684 | -0.018317 | -0.644939    |
| C       |                                                                                      | 0.882066  | 0.268725  | -0.510598    |
| O       |                                                                                      | -0.361504 | 0.219448  | 0.219351     |
| C       |                                                                                      | 1.609458  | -1.087185 | -0.424053    |
| C       |                                                                                      | 0.255459  | -0.706000 | -3.774357    |
| C       |                                                                                      | -2.543954 | -0.821261 | 0.119737     |
| H       |                                                                                      | -0.982134 | 0.918021  | -2.976333    |
| H       |                                                                                      | -1.928503 | 0.939399  | -0.997660    |
| H       |                                                                                      | 1.490068  | 1.035443  | -0.010964    |
| H       |                                                                                      | 1.009763  | -1.874227 | -0.885988    |
| H       |                                                                                      | 2.580305  | -1.017480 | -0.930945    |
| H       |                                                                                      | 1.775282  | -1.340465 | 0.630294     |
| H       |                                                                                      | -0.560810 | -1.085100 | -4.399290    |
| H       |                                                                                      | 0.894034  | -0.058113 | -4.384094    |
| H       |                                                                                      | 0.849902  | -1.547534 | -3.400732    |
| H       |                                                                                      | -3.453084 | -0.890928 | -0.485569    |
| H       |                                                                                      | -2.158960 | -1.823983 | 0.341516     |
| H       |                                                                                      | -2.781049 | -0.310380 | 1.059017     |
| Cl      |                                                                                      | -3.238536 | 2.087159  | -2.854778    |
| Complex | $2^{\cdot-}\text{Br}^- - \text{B97D3/6-31+G(d)} + \text{PCM}(\text{acetonitrile})$   |           |           |              |
| Atom    | X                                                                                    | Y         | Z         |              |
| C       |                                                                                      | -0.368992 | -0.029272 | -2.698276    |
| O       |                                                                                      | -1.123908 | -0.888994 | -1.849836    |
| O       |                                                                                      | 0.529597  | 0.790142  | -1.912955    |
| C       |                                                                                      | -1.605895 | -0.158580 | -0.717861    |
| C       |                                                                                      | 0.742458  | 0.365263  | -0.569133    |
| O       |                                                                                      | -0.503283 | 0.190182  | 0.140202     |
| C       |                                                                                      | 1.615683  | -0.883825 | -0.435418    |
| C       |                                                                                      | 0.364105  | -0.870252 | -3.728354    |
| C       |                                                                                      | -2.573161 | -1.026449 | 0.058481     |
| H       |                                                                                      | -1.045760 | 0.697765  | -3.177376    |
| H       |                                                                                      | -2.075533 | 0.772060  | -1.077395    |
| H       |                                                                                      | 1.239758  | 1.221911  | -0.094564    |
| H       |                                                                                      | 1.112222  | -1.767638 | -0.843047    |
| H       |                                                                                      | 2.569705  | -0.729654 | -0.960189    |
| H       |                                                                                      | 1.827658  | -1.060883 | 0.629012     |
| H       |                                                                                      | -0.363024 | -1.411713 | -4.350433    |
| H       |                                                                                      | 0.958000  | -0.212988 | -4.377608    |
| H       |                                                                                      | 1.032956  | -1.593079 | -3.244500    |
| H       |                                                                                      | -3.458503 | -1.239540 | -0.556319    |
| H       |                                                                                      | -2.091934 | -1.971867 | 0.345363     |
| H       |                                                                                      | -2.894526 | -0.499035 | 0.966761     |
| Br      |                                                                                      | -2.740210 | 3.275195  | -2.120127    |
| Complex | $2^{\cdot-}\text{NO}_2^- - \text{B97D3/6-31+G(d)} + \text{PCM}(\text{acetonitrile})$ |           |           |              |
| Atom    | X                                                                                    | Y         | Z         |              |
| C       |                                                                                      | -0.184969 | -0.163366 | -2.622123    |
| O       |                                                                                      | -1.320380 | -0.818513 | -2.042730    |
| O       |                                                                                      | 0.969116  | -0.375254 | -1.796951    |
| C       |                                                                                      | -1.564198 | -0.315282 | -0.722838    |
| C       |                                                                                      | 0.733586  | 0.128386  | -0.476389    |
| O       |                                                                                      | -0.405923 | -0.524672 | 0.096849     |
| C       |                                                                                      | 1.947081  | -0.152514 | 0.382470     |
| C       |                                                                                      | 0.075784  | -0.748807 | -3.992564    |
| C       |                                                                                      | -2.734675 | -1.060449 | -0.119860    |
| H       |                                                                                      | -0.389156 | 0.922281  | -2.661335    |
| H       |                                                                                      | -1.751102 | 0.771803  | -0.792794    |
| H       |                                                                                      | 0.515321  | 1.209380  | -0.550492    |
| H       |                                                                                      | 2.134431  | -1.233758 | 0.433342     |
| H       |                                                                                      | 2.827120  | 0.345997  | -0.044940    |
| H       |                                                                                      | 1.780416  | 0.232477  | 1.397193     |
| H       |                                                                                      | -0.799839 | -0.590367 | -4.635921    |

|         |   |                                                                                               |           |           |
|---------|---|-----------------------------------------------------------------------------------------------|-----------|-----------|
| H       |   | 0.943359                                                                                      | -0.253526 | -4.448336 |
| H       |   | 0.275539                                                                                      | -1.826292 | -3.914890 |
| H       |   | -3.629423                                                                                     | -0.906711 | -0.737516 |
| H       |   | -2.514830                                                                                     | -2.135454 | -0.065190 |
| H       |   | -2.934048                                                                                     | -0.681511 | 0.891258  |
| O       |   | -0.338611                                                                                     | 3.597413  | -2.288783 |
| N       |   | -0.805549                                                                                     | 3.740951  | -1.114114 |
| O       |   | -2.016591                                                                                     | 3.388127  | -0.947591 |
| Complex |   | $3^{\cdot\cdot\cdot}\text{Cl}^- - \text{B97D3/6-31+G(d)} + \text{PCM}(\text{acetonitrile})$   |           |           |
| Atom    | X | Y                                                                                             | Z         |           |
| C       |   | -0.277779                                                                                     | -0.396024 | -2.770982 |
| O       |   | -1.358270                                                                                     | -1.050842 | -2.104233 |
| O       |   | 0.889438                                                                                      | -0.413285 | -1.946738 |
| C       |   | -1.631323                                                                                     | -0.384300 | -0.869581 |
| C       |   | 0.611966                                                                                      | 0.235481  | -0.702211 |
| O       |   | -0.471297                                                                                     | -0.408968 | -0.038585 |
| C       |   | 1.844939                                                                                      | 0.214805  | 0.175906  |
| C       |   | 0.077923                                                                                      | -1.172315 | -4.027925 |
| C       |   | -2.744846                                                                                     | -1.170658 | -0.198535 |
| Cl      |   | -1.246076                                                                                     | -1.046436 | -5.263809 |
| Cl      |   | -3.342771                                                                                     | -0.309769 | 1.283854  |
| Cl      |   | 2.411250                                                                                      | -1.465818 | 0.590794  |
| H       |   | -0.562301                                                                                     | 0.648685  | -2.982038 |
| H       |   | -1.913802                                                                                     | 0.662771  | -1.072254 |
| H       |   | 0.339466                                                                                      | 1.289065  | -0.903307 |
| H       |   | 2.671523                                                                                      | 0.713533  | -0.339111 |
| H       |   | 1.629582                                                                                      | 0.722722  | 1.120919  |
| H       |   | 0.983036                                                                                      | -0.752305 | -4.476238 |
| H       |   | 0.219683                                                                                      | -2.233713 | -3.801649 |
| H       |   | -3.592202                                                                                     | -1.266328 | -0.883662 |
| H       |   | -2.390074                                                                                     | -2.158053 | 0.113020  |
| Cl      |   | -1.183883                                                                                     | 3.287039  | -1.998738 |
| Complex |   | $3^{\cdot\cdot\cdot}\text{Br}^- - \text{B97D3/6-31+G(d)} + \text{PCM}(\text{acetonitrile})$   |           |           |
| Atom    | X | Y                                                                                             | Z         |           |
| C       |   | -0.274014                                                                                     | -0.383674 | -2.769641 |
| O       |   | -1.352654                                                                                     | -1.046996 | -2.107498 |
| O       |   | 0.892691                                                                                      | -0.398359 | -1.942762 |
| C       |   | -1.630500                                                                                     | -0.386664 | -0.869685 |
| C       |   | 0.611482                                                                                      | 0.237615  | -0.692246 |
| O       |   | -0.472344                                                                                     | -0.414069 | -0.035448 |
| C       |   | 1.842470                                                                                      | 0.211292  | 0.186528  |
| C       |   | 0.089022                                                                                      | -1.150629 | -4.029151 |
| C       |   | -2.746076                                                                                     | -1.175781 | -0.207380 |
| Cl      |   | -1.233465                                                                                     | -1.018942 | -5.267474 |
| Cl      |   | -3.341417                                                                                     | -0.323602 | 1.282077  |
| Cl      |   | 2.414283                                                                                      | -1.471712 | 0.587618  |
| H       |   | -0.563124                                                                                     | 0.659117  | -2.978809 |
| H       |   | -1.914562                                                                                     | 0.660058  | -1.066972 |
| H       |   | 0.339311                                                                                      | 1.292557  | -0.882197 |
| H       |   | 2.668649                                                                                      | 0.716633  | -0.322704 |
| H       |   | 1.625065                                                                                      | 0.709682  | 1.136161  |
| H       |   | 0.993035                                                                                      | -0.722333 | -4.471985 |
| H       |   | 0.234303                                                                                      | -2.213749 | -3.813129 |
| H       |   | -3.593347                                                                                     | -1.260789 | -0.894090 |
| H       |   | -2.397816                                                                                     | -2.167689 | 0.097379  |
| Br      |   | -1.226809                                                                                     | 3.193320  | -2.033697 |
| Complex |   | $3^{\cdot\cdot\cdot}\text{NO}_2^- - \text{B97D3/6-31+G(d)} + \text{PCM}(\text{acetonitrile})$ |           |           |
| Atom    | X | Y                                                                                             | Z         |           |
| C       |   | -0.365113                                                                                     | -0.101290 | -2.599514 |
| O       |   | -1.386704                                                                                     | -0.831055 | -1.927192 |
| O       |   | 0.873074                                                                                      | -0.220522 | -1.902441 |
| C       |   | -1.530029                                                                                     | -0.339710 | -0.595340 |

| ARTICLE |                                                                      |           |           | Journal Name |
|---------|----------------------------------------------------------------------|-----------|-----------|--------------|
| C       |                                                                      | 0.731772  | 0.241346  | -0.560872    |
| O       |                                                                      | -0.297229 | -0.485741 | 0.113296     |
| C       |                                                                      | 2.043680  | 0.083136  | 0.178240     |
| C       |                                                                      | -0.209054 | -0.611092 | -4.017537    |
| C       |                                                                      | -2.549109 | -1.189971 | 0.144512     |
| Cl      |                                                                      | 0.262804  | -2.366719 | -4.105799    |
| Cl      |                                                                      | -4.218456 | -0.922082 | -0.517781    |
| Cl      |                                                                      | 2.617503  | -1.642697 | 0.275904     |
| H       |                                                                      | -0.656971 | 0.964299  | -2.645213    |
| H       |                                                                      | -1.810817 | 0.726852  | -0.629220    |
| H       |                                                                      | 0.466901  | 1.316446  | -0.566763    |
| H       |                                                                      | 2.824451  | 0.651926  | -0.335828    |
| H       |                                                                      | 1.931764  | 0.443072  | 1.205489     |
| H       |                                                                      | -1.158508 | -0.505965 | -4.551308    |
| H       |                                                                      | 0.574170  | -0.042029 | -4.527510    |
| H       |                                                                      | -2.317885 | -2.254357 | 0.037668     |
| H       |                                                                      | -2.568767 | -0.906087 | 1.200718     |
| O       |                                                                      | -1.732157 | 3.042289  | -1.720609    |
| N       |                                                                      | -0.659913 | 3.727408  | -1.695491    |
| O       |                                                                      | 0.058885  | 3.594784  | -0.653046    |
| Complex | 4 <sup>+</sup> Cl <sup>-</sup> - B97D3/6-31+G(d) + PCM(acetonitrile) |           |           |              |
| Atom    | X                                                                    | Y         | Z         |              |
| C       |                                                                      | -0.310480 | 0.199480  | -2.566497    |
| O       |                                                                      | -1.323294 | -0.606228 | -1.981829    |
| O       |                                                                      | 0.904096  | 0.084821  | -1.832023    |
| C       |                                                                      | -1.544483 | -0.191141 | -0.639346    |
| C       |                                                                      | 0.679851  | 0.479906  | -0.486661    |
| O       |                                                                      | -0.337085 | -0.321348 | 0.108577     |
| C       |                                                                      | 1.952395  | 0.287263  | 0.340152     |
| C       |                                                                      | -0.024646 | -0.263776 | -3.995492    |
| C       |                                                                      | -2.566634 | -1.157350 | -0.026234    |
| Cl      |                                                                      | 0.476595  | -1.993566 | -4.068501    |
| Cl      |                                                                      | -2.845634 | -0.734544 | 1.701642     |
| Cl      |                                                                      | 2.541337  | -1.415598 | 0.306189     |
| Cl      |                                                                      | 3.219810  | 1.434984  | -0.232397    |
| Cl      |                                                                      | -1.468884 | 0.049683  | -5.028230    |
| Cl      |                                                                      | -4.102271 | -1.092679 | -0.963246    |
| H       |                                                                      | -0.634501 | 1.255007  | -2.581163    |
| H       |                                                                      | -1.895066 | 0.853851  | -0.615000    |
| H       |                                                                      | 0.378270  | 1.541590  | -0.453478    |
| H       |                                                                      | 1.745239  | 0.532000  | 1.384389     |
| H       |                                                                      | 0.799010  | 0.323797  | -4.407245    |
| H       |                                                                      | -2.202931 | -2.187254 | -0.059421    |
| Cl      |                                                                      | -1.299521 | 3.500317  | -1.291093    |
| Complex | 4 <sup>+</sup> Br <sup>-</sup> - B97D3/6-31+G(d) + PCM(acetonitrile) |           |           |              |
| Atom    | X                                                                    | Y         | Z         |              |
| C       |                                                                      | -0.309773 | 0.201142  | -2.572547    |
| O       |                                                                      | -1.323890 | -0.601030 | -1.985484    |
| O       |                                                                      | 0.904385  | 0.092110  | -1.836016    |
| C       |                                                                      | -1.545953 | -0.182022 | -0.643872    |
| C       |                                                                      | 0.681610  | 0.485330  | -0.489481    |
| O       |                                                                      | -0.339034 | -0.312132 | 0.105633     |
| C       |                                                                      | 1.951639  | 0.286708  | 0.336482     |
| C       |                                                                      | -0.020878 | -0.269544 | -3.996983    |
| C       |                                                                      | -2.570705 | -1.141668 | -0.028455    |
| Cl      |                                                                      | 0.491545  | -1.997048 | -4.061786    |
| Cl      |                                                                      | -2.853616 | -0.701974 | 1.695093     |
| Cl      |                                                                      | 2.533798  | -1.419611 | 0.309024     |
| Cl      |                                                                      | 3.225942  | 1.425861  | -0.240422    |
| Cl      |                                                                      | -1.468297 | 0.027924  | -5.031194    |
| Cl      |                                                                      | -4.103523 | -1.075853 | -0.971212    |
| H       |                                                                      | -0.634239 | 1.255812  | -2.597004    |

|         |   |                                                                                     |           |           |
|---------|---|-------------------------------------------------------------------------------------|-----------|-----------|
| H       |   | -1.896492                                                                           | 0.862324  | -0.621453 |
| H       |   | 0.386177                                                                            | 1.548152  | -0.453157 |
| H       |   | 1.746622                                                                            | 0.536192  | 1.380030  |
| H       |   | 0.798564                                                                            | 0.320818  | -4.413161 |
| H       |   | -2.213044                                                                           | -2.174026 | -0.051375 |
| Br      |   | -1.308152                                                                           | 3.443884  | -1.222329 |
| Complex |   | 4 <sup>•••</sup> NO <sub>2</sub> <sup>-</sup> – B97D3/6–31+G(d) + PCM(acetonitrile) |           |           |
| Atom    | X |                                                                                     | Y         | Z         |
| C       |   | -0.273307                                                                           | 0.206336  | -2.566315 |
| O       |   | -1.277930                                                                           | -0.633984 | -2.014515 |
| O       |   | 0.926380                                                                            | 0.115652  | -1.802040 |
| C       |   | -1.541048                                                                           | -0.234223 | -0.676087 |
| C       |   | 0.659824                                                                            | 0.482415  | -0.457660 |
| O       |   | -0.349790                                                                           | -0.352720 | 0.101641  |
| C       |   | 1.917746                                                                            | 0.312682  | 0.396663  |
| C       |   | 0.062123                                                                            | -0.236675 | -3.990268 |
| C       |   | -2.563249                                                                           | -1.220029 | -0.095986 |
| Cl      |   | 0.614647                                                                            | -1.952258 | -4.066255 |
| Cl      |   | -2.895264                                                                           | -0.811998 | 1.626164  |
| Cl      |   | 2.555403                                                                            | -1.371463 | 0.350630  |
| Cl      |   | 3.164137                                                                            | 1.505610  | -0.128688 |
| Cl      |   | -1.363103                                                                           | 0.044270  | -5.058073 |
| Cl      |   | -4.074401                                                                           | -1.174644 | -1.073535 |
| H       |   | -0.626147                                                                           | 1.254589  | -2.588017 |
| H       |   | -1.904056                                                                           | 0.806286  | -0.649923 |
| H       |   | 0.327985                                                                            | 1.532817  | -0.407841 |
| H       |   | 1.679371                                                                            | 0.535370  | 1.439142  |
| H       |   | 0.879113                                                                            | 0.376963  | -4.376367 |
| H       |   | -2.182611                                                                           | -2.243938 | -0.124784 |
| O       |   | -1.309125                                                                           | 3.218081  | -0.502692 |
| N       |   | -0.853822                                                                           | 3.912466  | -1.468684 |
| O       |   | -1.019781                                                                           | 3.419641  | -2.629913 |
| Complex |   | 5 <sup>•••</sup> Cl <sup>-</sup> – B97D3/6–31+G(d) + PCM(acetonitrile)              |           |           |
| Atom    | X |                                                                                     | Y         | Z         |
| C       |   | -0.359187                                                                           | 0.181636  | -2.566419 |
| O       |   | -1.346613                                                                           | -0.652630 | -1.982580 |
| O       |   | 0.853718                                                                            | 0.090838  | -1.836665 |
| C       |   | -1.563411                                                                           | -0.256435 | -0.637883 |
| C       |   | 0.626857                                                                            | 0.483294  | -0.492957 |
| O       |   | -0.356382                                                                           | -0.347730 | 0.101827  |
| C       |   | 1.949812                                                                            | 0.311092  | 0.293713  |
| C       |   | -0.095576                                                                           | -0.312223 | -4.009930 |
| C       |   | -2.594229                                                                           | -1.223470 | -0.005925 |
| Cl      |   | 0.478479                                                                            | -2.015380 | -4.015549 |
| Cl      |   | -2.875206                                                                           | -0.702940 | 1.694892  |
| Cl      |   | 2.505020                                                                            | -1.397766 | 0.257441  |
| Cl      |   | 3.188692                                                                            | 1.379148  | -0.459399 |
| Cl      |   | 1.658235                                                                            | 0.829987  | 1.993137  |
| Cl      |   | -1.634374                                                                           | -0.175655 | -4.934722 |
| Cl      |   | 1.148836                                                                            | 0.761091  | -4.746340 |
| Cl      |   | -4.128265                                                                           | -1.090694 | -0.939077 |
| Cl      |   | -1.996109                                                                           | -2.918046 | -0.041170 |
| H       |   | -0.710619                                                                           | 1.227025  | -2.595289 |
| H       |   | -1.956912                                                                           | 0.773587  | -0.601877 |
| H       |   | 0.311495                                                                            | 1.539513  | -0.450770 |
| Cl      |   | -1.540796                                                                           | 3.305408  | -1.203045 |
| Complex |   | 5 <sup>•••</sup> Cl <sup>-</sup> – ZORA–BLYP–D3(BJ)/TZ2P                            |           |           |
| Atom    | X |                                                                                     | Y         | Z         |
| C       |   | -0.363443                                                                           | 0.194433  | -2.573225 |
| O       |   | -1.352317                                                                           | -0.656178 | -1.987265 |
| O       |   | 0.860925                                                                            | 0.093612  | -1.841167 |
| C       |   | -1.573085                                                                           | -0.246274 | -0.635154 |

## ARTICLE

## Journal Name

|    |           |           |           |
|----|-----------|-----------|-----------|
| C  | 0.626992  | 0.498014  | -0.489859 |
| O  | -0.356689 | -0.349166 | 0.109566  |
| C  | 1.943405  | 0.332355  | 0.294429  |
| C  | -0.103122 | -0.293887 | -4.011669 |
| C  | -2.602789 | -1.204950 | -0.005784 |
| Cl | 0.481207  | -2.011738 | -4.043397 |
| Cl | -2.898620 | -0.689026 | 1.702963  |
| Cl | 2.527920  | -1.385233 | 0.271321  |
| Cl | 3.195458  | 1.404229  | -0.451947 |
| Cl | 1.660930  | 0.849097  | 2.005118  |
| Cl | -1.644741 | -0.165811 | -4.949622 |
| Cl | 1.142811  | 0.779208  | -4.766342 |
| Cl | -4.147472 | -1.082806 | -0.939319 |
| Cl | -2.021384 | -2.924141 | -0.024790 |
| H  | -0.718397 | 1.242989  | -2.579823 |
| H  | -1.948979 | 0.794656  | -0.609266 |
| H  | 0.291140  | 1.552035  | -0.460117 |
| Cl | -1.436284 | 3.058231  | -1.193239 |

| Complex Atom | 5 <sup>-</sup> Br <sup>-</sup> – B97D3/6–31+G(d) + PCM(acetonitrile) |           |           |
|--------------|----------------------------------------------------------------------|-----------|-----------|
|              | X                                                                    | Y         | Z         |
| C            | -0.331927                                                            | 0.203172  | -2.589150 |
| O            | -1.292760                                                            | -0.483296 | -1.804010 |
| O            | 0.965521                                                             | 0.033306  | -2.042198 |
| C            | -1.259537                                                            | 0.000688  | -0.471503 |
| C            | 0.992379                                                             | 0.515101  | -0.708577 |
| O            | 0.034572                                                             | -0.167749 | 0.083686  |
| C            | 2.394752                                                             | 0.232309  | -0.120446 |
| C            | -0.341965                                                            | -0.408737 | -4.009665 |
| C            | -2.257876                                                            | -0.829094 | 0.369356  |
| Cl           | 0.064788                                                             | -2.159769 | -3.968456 |
| Cl           | -3.900616                                                            | -0.598443 | -0.332139 |
| Cl           | 2.760363                                                             | -1.528065 | -0.123835 |
| Cl           | 3.604319                                                             | 1.116134  | -1.120297 |
| Cl           | 2.426834                                                             | 0.866268  | 1.565339  |
| Cl           | -1.987567                                                            | -0.173951 | -4.703485 |
| Cl           | 0.865810                                                             | 0.482252  | -5.005366 |
| Cl           | -2.226598                                                            | -0.192635 | 2.054038  |
| Cl           | -1.824153                                                            | -2.574263 | 0.361622  |
| H            | -0.583675                                                            | 1.274923  | -2.653501 |
| H            | -1.554350                                                            | 1.062799  | -0.441788 |
| H            | 0.803120                                                             | 1.601317  | -0.689024 |
| Br           | -0.942453                                                            | 3.468840  | -1.269190 |

| Complex Atom | 5 <sup>-</sup> NO <sub>2</sub> <sup>-</sup> – B97D3/6–31+G(d) + PCM(acetonitrile) |           |           |
|--------------|-----------------------------------------------------------------------------------|-----------|-----------|
|              | X                                                                                 | Y         | Z         |
| C            | -0.291203                                                                         | 0.154233  | -2.628567 |
| O            | -1.302996                                                                         | -0.626004 | -2.015205 |
| O            | 0.919599                                                                          | 0.054922  | -1.899330 |
| C            | -1.500811                                                                         | -0.161344 | -0.686478 |
| C            | 0.706296                                                                          | 0.498737  | -0.566584 |
| O            | -0.298248                                                                         | -0.288562 | 0.054869  |
| C            | 2.025275                                                                          | 0.318239  | 0.220696  |
| C            | -0.045814                                                                         | -0.396728 | -4.055776 |
| C            | -2.583788                                                                         | -1.039318 | -0.018178 |
| Cl           | 0.476656                                                                          | -2.114465 | -4.002021 |
| Cl           | -2.833688                                                                         | -0.433093 | 1.659251  |
| Cl           | 2.542756                                                                          | -1.405021 | 0.237699  |
| Cl           | 3.287650                                                                          | 1.332736  | -0.567457 |
| Cl           | 1.752461                                                                          | 0.895757  | 1.904206  |
| Cl           | -1.581614                                                                         | -0.246345 | -4.983615 |
| Cl           | 1.228490                                                                          | 0.613239  | -4.830079 |
| Cl           | -4.108760                                                                         | -0.857476 | -0.958327 |
| Cl           | -2.086400                                                                         | -2.767858 | 0.019745  |



|                                                        |   |           |           |           |
|--------------------------------------------------------|---|-----------|-----------|-----------|
| H                                                      |   | -0.617391 | 1.204125  | -2.699311 |
| H                                                      |   | -1.834759 | 0.891044  | -0.706401 |
| H                                                      |   | 0.416436  | 1.565800  | -0.551867 |
| O                                                      |   | -2.000958 | 2.874320  | -1.748699 |
| N                                                      |   | -1.185513 | 3.816179  | -1.481528 |
| O                                                      |   | -0.330123 | 3.566109  | -0.574555 |
| <b>Complex 1 – B97D3/6–31+G(d) + PCM(acetonitrile)</b> |   |           |           |           |
| Atom                                                   | X |           | Y         | Z         |
| C                                                      |   | -0.524931 | 0.104735  | -2.534321 |
| O                                                      |   | -1.625596 | -0.496259 | -1.855801 |
| O                                                      |   | 0.699365  | -0.158492 | -1.852616 |
| C                                                      |   | -1.688751 | 0.008185  | -0.523640 |
| C                                                      |   | 0.612442  | 0.343251  | -0.520834 |
| O                                                      |   | -0.476344 | -0.254792 | 0.179205  |
| H                                                      |   | -0.683580 | 1.198048  | -2.603798 |
| H                                                      |   | -0.456713 | -0.355750 | -3.522607 |
| H                                                      |   | -2.490295 | -0.525447 | -0.007716 |
| H                                                      |   | -1.875086 | 1.099036  | -0.547991 |
| H                                                      |   | 0.479420  | 1.441930  | -0.546153 |
| H                                                      |   | 1.531509  | 0.060924  | -0.002168 |
| <b>Complex 2 – B97D3/6–31+G(d) + PCM(acetonitrile)</b> |   |           |           |           |
| Atom                                                   | X |           | Y         | Z         |
| C                                                      |   | -0.339756 | -0.037836 | -2.699538 |
| O                                                      |   | -1.121251 | -0.877340 | -1.854137 |
| O                                                      |   | 0.536017  | 0.794647  | -1.904531 |
| C                                                      |   | -1.577719 | -0.144561 | -0.715327 |
| C                                                      |   | 0.773259  | 0.341480  | -0.572809 |
| O                                                      |   | -0.470701 | 0.158361  | 0.144413  |
| C                                                      |   | 1.638352  | -0.914636 | -0.466895 |
| C                                                      |   | 0.407696  | -0.897403 | -3.704247 |
| C                                                      |   | -2.580752 | -0.981397 | 0.050486  |
| H                                                      |   | -1.001202 | 0.683378  | -3.211669 |
| H                                                      |   | -2.022176 | 0.804339  | -1.069953 |
| H                                                      |   | 1.278987  | 1.187731  | -0.089944 |
| H                                                      |   | 1.120970  | -1.793855 | -0.866137 |
| H                                                      |   | 2.582476  | -0.763902 | -1.009650 |
| H                                                      |   | 1.870161  | -1.097189 | 0.592204  |
| H                                                      |   | -0.312323 | -1.441062 | -4.332331 |
| H                                                      |   | 1.016699  | -0.251139 | -4.350228 |
| H                                                      |   | 1.062250  | -1.618968 | -3.201234 |
| H                                                      |   | -3.471047 | -1.156632 | -0.568380 |
| H                                                      |   | -2.133184 | -1.945444 | 0.327816  |
| H                                                      |   | -2.883479 | -0.451724 | 0.963472  |
| <b>Complex 3 – B97D3/6–31+G(d) + PCM(acetonitrile)</b> |   |           |           |           |
| Atom                                                   | X |           | Y         | Z         |
| C                                                      |   | -0.273337 | -0.379172 | -2.770691 |
| O                                                      |   | -1.355818 | -1.030567 | -2.110709 |
| O                                                      |   | 0.888980  | -0.386835 | -1.944069 |
| C                                                      |   | -1.632369 | -0.382071 | -0.871161 |
| C                                                      |   | 0.611159  | 0.242235  | -0.693997 |
| O                                                      |   | -0.475746 | -0.398351 | -0.040077 |
| C                                                      |   | 1.843576  | 0.205361  | 0.188223  |
| C                                                      |   | 0.087991  | -1.153396 | -4.028175 |
| C                                                      |   | -2.741612 | -1.179949 | -0.204899 |
| Cl                                                     |   | -1.230864 | -1.026033 | -5.266507 |
| Cl                                                     |   | -3.344679 | -0.331432 | 1.280220  |
| Cl                                                     |   | 2.394475  | -1.481569 | 0.577890  |
| H                                                      |   | -0.559494 | 0.664736  | -2.994390 |
| H                                                      |   | -1.932558 | 0.664711  | -1.061862 |
| H                                                      |   | 0.351208  | 1.304030  | -0.876996 |
| H                                                      |   | 2.672311  | 0.708221  | -0.319237 |
| H                                                      |   | 1.626589  | 0.703339  | 1.138113  |

## ARTICLE

## Journal Name

|                                                                              |           |           |           |
|------------------------------------------------------------------------------|-----------|-----------|-----------|
| H                                                                            | 0.995387  | -0.732587 | -4.470843 |
| H                                                                            | 0.229411  | -2.214080 | -3.799580 |
| H                                                                            | -3.586650 | -1.278941 | -0.892263 |
| H                                                                            | -2.376967 | -2.165685 | 0.099602  |
| Complex <b>4</b> – B97D3/6–31+G(d) + PCM(acetonitrile)                       |           |           |           |
| Atom                                                                         | X         | Y         | Z         |
| C                                                                            | -0.311788 | 0.207190  | -2.572617 |
| O                                                                            | -1.326611 | -0.586449 | -1.984360 |
| O                                                                            | 0.898120  | 0.111862  | -1.834789 |
| C                                                                            | -1.546598 | -0.177406 | -0.643327 |
| C                                                                            | 0.678894  | 0.492645  | -0.487706 |
| O                                                                            | -0.342542 | -0.297799 | 0.105076  |
| C                                                                            | 1.955115  | 0.282587  | 0.334813  |
| C                                                                            | -0.018686 | -0.278133 | -3.996356 |
| C                                                                            | -2.570083 | -1.143807 | -0.029088 |
| Cl                                                                           | 0.480498  | -2.005053 | -4.030987 |
| Cl                                                                           | -2.848617 | -0.718713 | 1.696395  |
| Cl                                                                           | 2.522413  | -1.422357 | 0.277662  |
| Cl                                                                           | 3.227320  | 1.426333  | -0.231636 |
| Cl                                                                           | -1.457992 | 0.020399  | -5.038434 |
| Cl                                                                           | -4.101814 | -1.082050 | -0.969423 |
| H                                                                            | -0.639630 | 1.261467  | -2.617661 |
| H                                                                            | -1.910206 | 0.864689  | -0.615031 |
| H                                                                            | 0.396303  | 1.559699  | -0.437463 |
| H                                                                            | 1.750777  | 0.519662  | 1.381459  |
| H                                                                            | 0.807064  | 0.304417  | -4.411289 |
| H                                                                            | -2.201102 | -2.171717 | -0.062576 |
| Complex <b>5</b> – B97D3/6–31+G(d) + PCM(acetonitrile)                       |           |           |           |
| Atom                                                                         | X         | Y         | Z         |
| C                                                                            | -0.242604 | 0.190662  | -2.664503 |
| O                                                                            | -1.292289 | -0.530432 | -2.048735 |
| O                                                                            | 0.941107  | 0.106787  | -1.894120 |
| C                                                                            | -1.517165 | -0.038297 | -0.741874 |
| C                                                                            | 0.711128  | 0.585629  | -0.582947 |
| O                                                                            | -0.338988 | -0.132592 | 0.035165  |
| C                                                                            | 2.004558  | 0.368870  | 0.248486  |
| C                                                                            | 0.036262  | -0.445549 | -4.053411 |
| C                                                                            | -2.613797 | -0.910407 | -0.073010 |
| Cl                                                                           | 0.515961  | -2.163710 | -3.878367 |
| Cl                                                                           | -2.899918 | -0.267666 | 1.583566  |
| Cl                                                                           | 2.434143  | -1.370099 | 0.311173  |
| Cl                                                                           | 3.326929  | 1.310750  | -0.528348 |
| Cl                                                                           | 1.707698  | 0.997878  | 1.908507  |
| Cl                                                                           | -1.466604 | -0.314965 | -5.035150 |
| Cl                                                                           | 1.356002  | 0.493364  | -4.838291 |
| Cl                                                                           | -4.117330 | -0.756573 | -1.050239 |
| Cl                                                                           | -2.097932 | -2.625111 | 0.007334  |
| H                                                                            | -0.535233 | 1.244146  | -2.813028 |
| H                                                                            | -1.872488 | 1.005472  | -0.779690 |
| H                                                                            | 0.483600  | 1.664845  | -0.599488 |
| Complex $\text{NO}_2^-$ – B97D3/6–31+G(d) + PCM(acetonitrile)                |           |           |           |
| Atom                                                                         | X         | Y         | Z         |
| O                                                                            | -1.308738 | 3.219039  | -0.501186 |
| N                                                                            | -0.854915 | 3.910420  | -1.468751 |
| O                                                                            | -1.019074 | 3.420729  | -2.631351 |
| Complex <b>1</b> –Cl <sup>-</sup> – BLYP–D3BJ/Def2–TZVP + CPCM(acetonitrile) |           |           |           |
| Atom                                                                         | X         | Y         | Z         |
| C                                                                            | -0.523228 | 0.110419  | -2.543076 |
| O                                                                            | -1.629069 | -0.501728 | -1.859528 |
| O                                                                            | 0.707460  | -0.171364 | -1.855081 |
| C                                                                            | -1.695145 | 0.023607  | -0.523099 |
| C                                                                            | 0.621304  | 0.348004  | -0.517555 |

|                                                                                                                                                           |  |           |  |           |  |           |
|-----------------------------------------------------------------------------------------------------------------------------------------------------------|--|-----------|--|-----------|--|-----------|
| O                                                                                                                                                         |  | -0.475712 |  | -0.258770 |  | 0.185171  |
| H                                                                                                                                                         |  | -0.677533 |  | 1.201177  |  | -2.588898 |
| H                                                                                                                                                         |  | -0.456432 |  | -0.345726 |  | -3.532775 |
| H                                                                                                                                                         |  | -2.501578 |  | -0.499564 |  | -0.005345 |
| H                                                                                                                                                         |  | -1.853012 |  | 1.113883  |  | -0.564791 |
| H                                                                                                                                                         |  | 0.475785  |  | 1.439936  |  | -0.556040 |
| H                                                                                                                                                         |  | 1.539204  |  | 0.065412  |  | 0.002666  |
| Cl                                                                                                                                                        |  | -1.100044 |  | 3.739714  |  | -1.296648 |
| <b>Complex</b> $1^{\cdots}\text{Br}^-$ – BLYP–D3BJ/Def2–TZVP + CPCM(acetonitrile)                                                                         |  |           |  |           |  |           |
| Atom                                                                                                                                                      |  | X         |  | Y         |  | Z         |
| C                                                                                                                                                         |  | -0.524324 |  | 0.096931  |  | -2.541054 |
| O                                                                                                                                                         |  | -1.627214 |  | -0.518952 |  | -1.857626 |
| O                                                                                                                                                         |  | 0.707637  |  | -0.178136 |  | -1.854576 |
| C                                                                                                                                                         |  | -1.693709 |  | 0.001186  |  | -0.520517 |
| C                                                                                                                                                         |  | 0.620741  |  | 0.335441  |  | -0.515937 |
| O                                                                                                                                                         |  | -0.473494 |  | -0.275471 |  | 0.186157  |
| H                                                                                                                                                         |  | -0.684043 |  | 1.187151  |  | -2.589831 |
| H                                                                                                                                                         |  | -0.456193 |  | -0.357056 |  | -3.531524 |
| H                                                                                                                                                         |  | -2.498446 |  | -0.524532 |  | -0.003011 |
| H                                                                                                                                                         |  | -1.859836 |  | 1.090926  |  | -0.557535 |
| H                                                                                                                                                         |  | 0.473899  |  | 1.427756  |  | -0.549066 |
| H                                                                                                                                                         |  | 1.540294  |  | 0.056203  |  | 0.002899  |
| Br                                                                                                                                                        |  | -1.086312 |  | 3.972553  |  | -1.334379 |
| <b>Complex</b> $1^{\cdots}\text{NO}_2^-$ – BLYP–D3BJ/Def2–TZVP + CPCM(acetonitrile)                                                                       |  |           |  |           |  |           |
| Atom                                                                                                                                                      |  | X         |  | Y         |  | Z         |
| C                                                                                                                                                         |  | -0.253310 |  | -0.111848 |  | -2.475052 |
| O                                                                                                                                                         |  | -1.541419 |  | -0.538640 |  | -2.001970 |
| O                                                                                                                                                         |  | 0.773500  |  | -0.502543 |  | -1.547131 |
| C                                                                                                                                                         |  | -1.792529 |  | 0.068595  |  | -0.724792 |
| C                                                                                                                                                         |  | 0.504809  |  | 0.103650  |  | -0.273528 |
| O                                                                                                                                                         |  | -0.778964 |  | -0.310064 |  | 0.219853  |
| H                                                                                                                                                         |  | -0.246859 |  | 0.984410  |  | -2.594490 |
| H                                                                                                                                                         |  | -0.060085 |  | -0.635019 |  | -3.413739 |
| H                                                                                                                                                         |  | -2.743248 |  | -0.323137 |  | -0.357595 |
| H                                                                                                                                                         |  | -1.809441 |  | 1.164981  |  | -0.837383 |
| H                                                                                                                                                         |  | 0.531384  |  | 1.200626  |  | -0.378568 |
| H                                                                                                                                                         |  | 1.257140  |  | -0.261099 |  | 0.429152  |
| O                                                                                                                                                         |  | 0.593876  |  | 3.366250  |  | -1.669118 |
| N                                                                                                                                                         |  | -0.549606 |  | 3.807882  |  | -1.309278 |
| O                                                                                                                                                         |  | -1.550247 |  | 3.354956  |  | -1.960360 |
| <b>Complex</b> $1^{\cdots}\text{Cl}^-$ – BLYP–D3BJ/Def2–TZVP + CPCM(acetonitrile) – $r(\text{C}^{\cdots}\text{H}^{\cdots}\text{Anion}) = 3.5 \text{ \AA}$ |  |           |  |           |  |           |
| Atom                                                                                                                                                      |  | X         |  | Y         |  | Z         |
| C                                                                                                                                                         |  | -0.570940 |  | 0.202542  |  | -2.524973 |
| O                                                                                                                                                         |  | -1.616476 |  | -0.531409 |  | -1.863552 |
| O                                                                                                                                                         |  | 0.685216  |  | -0.012426 |  | -1.861232 |
| C                                                                                                                                                         |  | -1.707834 |  | -0.090673 |  | -0.501553 |
| C                                                                                                                                                         |  | 0.570648  |  | 0.438245  |  | -0.502156 |
| O                                                                                                                                                         |  | -0.462382 |  | -0.294046 |  | 0.180848  |
| H                                                                                                                                                         |  | -0.806437 |  | 1.280060  |  | -2.517538 |
| H                                                                                                                                                         |  | -0.480639 |  | -0.199152 |  | -3.536365 |
| H                                                                                                                                                         |  | -2.459488 |  | -0.708131 |  | -0.005426 |
| H                                                                                                                                                         |  | -1.973329 |  | 0.979831  |  | -0.475987 |
| H                                                                                                                                                         |  | 0.333522  |  | 1.515353  |  | -0.494724 |
| H                                                                                                                                                         |  | 1.514705  |  | 0.213747  |  | -0.000712 |
| Cl                                                                                                                                                        |  | -0.481802 |  | 3.913873  |  | -1.666261 |
| <b>Complex</b> $1^{\cdots}\text{Cl}^-$ – ZORA–BLYP–D3BJ/TZ2P – $r(\text{C}^{\cdots}\text{H}^{\cdots}\text{Anion}) = 3.5 \text{ \AA}$                      |  |           |  |           |  |           |
| Atom                                                                                                                                                      |  | X         |  | Y         |  | Z         |
| C                                                                                                                                                         |  | -0.569080 |  | 0.232682  |  | -2.514495 |
| O                                                                                                                                                         |  | -1.624256 |  | -0.521483 |  | -1.867097 |
| O                                                                                                                                                         |  | 0.679872  |  | -0.014153 |  | -1.855374 |
| C                                                                                                                                                         |  | -1.712672 |  | -0.105416 |  | -0.499082 |
| C                                                                                                                                                         |  | 0.556401  |  | 0.469173  |  | -0.510888 |

|    |           |           |           |
|----|-----------|-----------|-----------|
| O  | -0.467353 | -0.280651 | 0.188646  |
| H  | -0.788829 | 1.314194  | -2.488943 |
| H  | -0.485893 | -0.160371 | -3.529890 |
| H  | -2.440663 | -0.760547 | -0.012704 |
| H  | -2.020536 | 0.950044  | -0.448368 |
| H  | 0.308383  | 1.544704  | -0.530943 |
| H  | 1.498647  | 0.258989  | -0.000576 |
| Cl | -0.389258 | 3.780648  | -1.699918 |

| Complex $1^{\cdots}\text{Br}^-$ – BLYP–D3BJ/Def2–TZVP + CPCM(acetonitrile) – $r(\text{C}\cdots\text{H}\cdots\text{Anion}) = 3.5 \text{ \AA}$ |           |           |           |
|----------------------------------------------------------------------------------------------------------------------------------------------|-----------|-----------|-----------|
| Atom                                                                                                                                         | X         | Y         | Z         |
| C                                                                                                                                            | -0.938398 | 0.452268  | -2.795916 |
| O                                                                                                                                            | -1.936139 | -0.398508 | -2.206646 |
| O                                                                                                                                            | 0.335391  | -0.211691 | -2.818645 |
| C                                                                                                                                            | -1.536894 | -0.724643 | -0.867793 |
| C                                                                                                                                            | 0.713394  | -0.539462 | -1.472169 |
| O                                                                                                                                            | -0.269225 | -1.397448 | -0.869854 |
| H                                                                                                                                            | -0.856381 | 1.384889  | -2.212841 |
| H                                                                                                                                            | -1.232259 | 0.634420  | -3.831465 |
| H                                                                                                                                            | -2.277166 | -1.417178 | -0.461574 |
| H                                                                                                                                            | -1.462729 | 0.199292  | -0.270026 |
| H                                                                                                                                            | 0.808661  | 0.387431  | -0.882064 |
| H                                                                                                                                            | 1.650490  | -1.097902 | -1.520874 |
| Br                                                                                                                                           | 0.201002  | 3.275766  | -0.138454 |

| Complex $1^{\cdots}\text{Br}^-$ – ZORA–BLYP–D3BJ/TZ2P – $r(\text{C}\cdots\text{H}\cdots\text{Anion}) = 3.5 \text{ \AA}$ |           |           |           |
|-------------------------------------------------------------------------------------------------------------------------|-----------|-----------|-----------|
| Atom                                                                                                                    | X         | Y         | Z         |
| C                                                                                                                       | -0.934019 | 0.480295  | -2.763958 |
| O                                                                                                                       | -1.940587 | -0.395307 | -2.206812 |
| O                                                                                                                       | 0.334195  | -0.190165 | -2.802434 |
| C                                                                                                                       | -1.546495 | -0.750240 | -0.874894 |
| C                                                                                                                       | 0.703460  | -0.497629 | -1.450857 |
| O                                                                                                                       | -0.265780 | -1.394918 | -0.863308 |
| H                                                                                                                       | -0.846136 | 1.399231  | -2.159916 |
| H                                                                                                                       | -1.227699 | 0.680167  | -3.796352 |
| H                                                                                                                       | -2.274893 | -1.477895 | -0.508275 |
| H                                                                                                                       | -1.514227 | 0.151211  | -0.244198 |
| H                                                                                                                       | 0.767370  | 0.435147  | -0.865703 |
| H                                                                                                                       | 1.651118  | -1.038590 | -1.487166 |
| Br                                                                                                                      | 0.293442  | 3.145927  | -0.324448 |

| Complex $1^{\cdots}\text{NO}_2^-$ – BLYP–D3BJ/Def2–TZVP + CPCM(acetonitrile) – $r(\text{C}\cdots\text{H}\cdots\text{Anion}) = 3.5 \text{ \AA}$ |           |           |           |
|------------------------------------------------------------------------------------------------------------------------------------------------|-----------|-----------|-----------|
| Atom                                                                                                                                           | X         | Y         | Z         |
| C                                                                                                                                              | -0.329320 | 0.210073  | -2.502119 |
| O                                                                                                                                              | -1.575753 | -0.324072 | -2.023210 |
| O                                                                                                                                              | 0.759008  | -0.246176 | -1.682318 |
| C                                                                                                                                              | -1.777915 | 0.083475  | -0.663253 |
| C                                                                                                                                              | 0.533563  | 0.178024  | -0.330205 |
| O                                                                                                                                              | -0.699294 | -0.367939 | 0.167303  |
| H                                                                                                                                              | -0.362189 | 1.312668  | -2.496113 |
| H                                                                                                                                              | -0.170900 | -0.189327 | -3.506060 |
| H                                                                                                                                              | -2.690989 | -0.398650 | -0.308676 |
| H                                                                                                                                              | -1.850220 | 1.182649  | -0.608588 |
| H                                                                                                                                              | 0.494050  | 1.279558  | -0.292807 |
| H                                                                                                                                              | 1.341459  | -0.228473 | 0.281591  |
| O                                                                                                                                              | 0.477836  | 3.553319  | -1.252382 |
| N                                                                                                                                              | -0.652016 | 4.042285  | -1.595168 |
| O                                                                                                                                              | -1.025217 | 3.792111  | -2.790348 |

| Complex $1^{\cdots}\text{NO}_2^-$ – ZORA–BLYP–D3BJ/TZ2P – $r(\text{C}\cdots\text{H}\cdots\text{Anion}) = 3.5 \text{ \AA}$ |           |           |           |
|---------------------------------------------------------------------------------------------------------------------------|-----------|-----------|-----------|
| Atom                                                                                                                      | X         | Y         | Z         |
| C                                                                                                                         | -0.418064 | 0.189609  | -2.557172 |
| O                                                                                                                         | -1.634027 | -0.312519 | -1.963458 |
| O                                                                                                                         | 0.724222  | -0.257405 | -1.805677 |
| C                                                                                                                         | -1.719865 | 0.177357  | -0.613519 |
| C                                                                                                                         | 0.600971  | 0.275722  | -0.477182 |

|   |           |           |           |
|---|-----------|-----------|-----------|
| O | -0.585274 | -0.249074 | 0.157889  |
| H | -0.421700 | 1.290692  | -2.592677 |
| H | -0.345537 | -0.258666 | -3.550579 |
| H | -2.603869 | -0.282848 | -0.165054 |
| H | -1.768078 | 1.276460  | -0.612358 |
| H | 0.537927  | 1.375548  | -0.518460 |
| H | 1.455384  | -0.087681 | 0.098220  |
| O | -0.703575 | 3.354511  | -0.607770 |
| N | -0.724707 | 3.933263  | -1.758879 |
| O | 0.078295  | 3.454556  | -2.635674 |

| Complex | 2 <sup>-</sup> Cl <sup>-</sup> – BLYP–D3BJ/Def2–TZVP + CPCM(acetonitrile) – r(C–H <sup>⋯</sup> Anion) = 3.5 Å |           |           |
|---------|---------------------------------------------------------------------------------------------------------------|-----------|-----------|
| Atom    | X                                                                                                             | Y         | Z         |
| C       | -0.400269                                                                                                     | 0.179492  | -2.571127 |
| O       | -1.174136                                                                                                     | -0.742321 | -1.789198 |
| O       | 0.541873                                                                                                      | 0.888766  | -1.708947 |
| C       | -1.563553                                                                                                     | -0.129373 | -0.552893 |
| C       | 0.822083                                                                                                      | 0.266767  | -0.452421 |
| O       | -0.405008                                                                                                     | 0.019070  | 0.295767  |
| C       | 1.656832                                                                                                      | -1.012275 | -0.537388 |
| C       | 0.283976                                                                                                      | -0.576040 | -3.695237 |
| C       | -2.573873                                                                                                     | -1.009615 | 0.151646  |
| H       | -1.062720                                                                                                     | 0.970945  | -2.956117 |
| H       | -1.974860                                                                                                     | 0.869752  | -0.775213 |
| H       | 1.369738                                                                                                      | 1.031850  | 0.111810  |
| H       | 1.105394                                                                                                      | -1.818070 | -1.030039 |
| H       | 2.586769                                                                                                      | -0.813412 | -1.084971 |
| H       | 1.915368                                                                                                      | -1.334264 | 0.479044  |
| H       | -0.475311                                                                                                     | -1.009060 | -4.359290 |
| H       | 0.895120                                                                                                      | 0.122823  | -4.278953 |
| H       | 0.923406                                                                                                      | -1.377148 | -3.310000 |
| H       | -3.494433                                                                                                     | -1.065053 | -0.440633 |
| H       | -2.164305                                                                                                     | -2.017878 | 0.286502  |
| H       | -2.811559                                                                                                     | -0.585674 | 1.133895  |
| Cl      | -3.055437                                                                                                     | 2.543859  | -3.652664 |

| Complex | 2 <sup>-</sup> Cl <sup>-</sup> – ZORA–BLYP–D3BJ/TZ2P – r(C–H <sup>⋯</sup> Anion) = 3.5 Å |           |           |
|---------|------------------------------------------------------------------------------------------|-----------|-----------|
| Atom    | X                                                                                        | Y         | Z         |
| C       | -0.398276                                                                                | 0.234945  | -2.540605 |
| O       | -1.127916                                                                                | -0.724155 | -1.756096 |
| O       | 0.619992                                                                                 | 0.876188  | -1.688815 |
| C       | -1.539799                                                                                | -0.107894 | -0.543073 |
| C       | 0.841785                                                                                 | 0.259663  | -0.431607 |
| O       | -0.384062                                                                                | 0.069995  | 0.324924  |
| C       | 1.625314                                                                                 | -1.063061 | -0.505175 |
| C       | 0.220577                                                                                 | -0.474200 | -3.727906 |
| C       | -2.540479                                                                                | -0.999095 | 0.164210  |
| H       | -1.081943                                                                                | 1.035816  | -2.871900 |
| H       | -1.964123                                                                                | 0.880188  | -0.771740 |
| H       | 1.426433                                                                                 | 0.995157  | 0.137477  |
| H       | 1.045229                                                                                 | -1.826599 | -1.027626 |
| H       | 2.574563                                                                                 | -0.898902 | -1.030100 |
| H       | 1.836902                                                                                 | -1.413802 | 0.512476  |
| H       | -0.586100                                                                                | -0.822352 | -4.381685 |
| H       | 0.829696                                                                                 | 0.242775  | -4.287531 |
| H       | 0.844047                                                                                 | -1.320444 | -3.417254 |
| H       | -3.451412                                                                                | -1.066734 | -0.438888 |
| H       | -2.114784                                                                                | -1.999182 | 0.302965  |
| H       | -2.786036                                                                                | -0.574539 | 1.143365  |
| Cl      | -2.944511                                                                                | 2.099374  | -3.901842 |

| Complex | 2 <sup>-</sup> Br <sup>-</sup> – BLYP–D3BJ/Def2–TZVP + CPCM(acetonitrile) – r(C–H <sup>⋯</sup> Anion) = 3.5 Å |           |           |
|---------|---------------------------------------------------------------------------------------------------------------|-----------|-----------|
| Atom    | X                                                                                                             | Y         | Z         |
| C       | -0.268909                                                                                                     | 0.122130  | -2.701020 |
| O       | -1.073569                                                                                                     | -0.799458 | -1.946163 |

| ARTICLE |                                                                                                                                           |           |           | Journal Name |
|---------|-------------------------------------------------------------------------------------------------------------------------------------------|-----------|-----------|--------------|
| O       | 0.953775                                                                                                                                  | 0.396397  | -1.978195 |              |
| C       | -1.591064                                                                                                                                 | -0.156087 | -0.776828 |              |
| C       | 0.791401                                                                                                                                  | 0.337028  | -0.534452 |              |
| O       | -0.552963                                                                                                                                 | 0.652265  | -0.151539 |              |
| C       | 1.315550                                                                                                                                  | -0.994167 | 0.008350  |              |
| C       | 0.083375                                                                                                                                  | -0.497486 | -4.035926 |              |
| C       | -2.161485                                                                                                                                 | -1.206452 | 0.159189  |              |
| H       | -0.834831                                                                                                                                 | 1.060699  | -2.819805 |              |
| H       | -2.358027                                                                                                                                 | 0.576651  | -1.071196 |              |
| H       | 1.386268                                                                                                                                  | 1.164322  | -0.128411 |              |
| H       | 0.785738                                                                                                                                  | -1.842547 | -0.433579 |              |
| H       | 2.382059                                                                                                                                  | -1.080096 | -0.236738 |              |
| H       | 1.205497                                                                                                                                  | -1.019257 | 1.100258  |              |
| H       | -0.826265                                                                                                                                 | -0.637159 | -4.631945 |              |
| H       | 0.763084                                                                                                                                  | 0.167983  | -4.581442 |              |
| H       | 0.574667                                                                                                                                  | -1.466596 | -3.885710 |              |
| H       | -3.000830                                                                                                                                 | -1.717141 | -0.329637 |              |
| H       | -1.401515                                                                                                                                 | -1.945419 | 0.433574  |              |
| H       | -2.533141                                                                                                                                 | -0.718359 | 1.067447  |              |
| Br      | -2.660274                                                                                                                                 | 3.204767  | -3.362845 |              |
| Complex | $2 \cdots \text{NO}_2^-$ – BLYP–D3BJ/Def2–TZVP + CPCM(acetonitrile) – $r(\text{C} \cdots \text{H} \cdots \text{Anion}) = 3.5 \text{ \AA}$ |           |           |              |
| Atom    | X                                                                                                                                         | Y         | Z         |              |
| C       | -0.269569                                                                                                                                 | 0.047518  | -2.606893 |              |
| O       | -1.392545                                                                                                                                 | -0.618211 | -1.993408 |              |
| O       | 0.928006                                                                                                                                  | -0.246906 | -1.859566 |              |
| C       | -1.548655                                                                                                                                 | -0.193066 | -0.625195 |              |
| C       | 0.782890                                                                                                                                  | 0.196708  | -0.495835 |              |
| O       | -0.340441                                                                                                                                 | -0.476562 | 0.108910  |              |
| C       | 2.036272                                                                                                                                  | -0.155974 | 0.272853  |              |
| C       | -0.107156                                                                                                                                 | -0.466568 | -4.019391 |              |
| C       | -2.693367                                                                                                                                 | -0.959150 | -0.001612 |              |
| H       | -0.440788                                                                                                                                 | 1.136463  | -2.571226 |              |
| H       | -1.712026                                                                                                                                 | 0.897102  | -0.610787 |              |
| H       | 0.576615                                                                                                                                  | 1.280456  | -0.503031 |              |
| H       | 2.196125                                                                                                                                  | -1.241050 | 0.257444  |              |
| H       | 2.900779                                                                                                                                  | 0.342646  | -0.179702 |              |
| H       | 1.940439                                                                                                                                  | 0.179474  | 1.311803  |              |
| H       | -1.014632                                                                                                                                 | -0.254890 | -4.597344 |              |
| H       | 0.741109                                                                                                                                  | 0.034280  | -4.499818 |              |
| H       | 0.069961                                                                                                                                  | -1.549007 | -4.010211 |              |
| H       | -3.619164                                                                                                                                 | -0.751135 | -0.550376 |              |
| H       | -2.489747                                                                                                                                 | -2.036838 | -0.032759 |              |
| H       | -2.823476                                                                                                                                 | -0.646391 | 1.040766  |              |
| O       | -1.077442                                                                                                                                 | 3.360625  | -0.496585 |              |
| N       | -1.476187                                                                                                                                 | 3.689002  | -1.664776 |              |
| O       | -0.618343                                                                                                                                 | 3.559507  | -2.602133 |              |
| Complex | $3 \cdots \text{Cl}^-$ – BLYP–D3BJ/Def2–TZVP + CPCM(acetonitrile) – $r(\text{C} \cdots \text{H} \cdots \text{Anion}) = 3.5 \text{ \AA}$   |           |           |              |
| Atom    | X                                                                                                                                         | Y         | Z         |              |
| C       | -0.248254                                                                                                                                 | -0.325520 | -2.768138 |              |
| O       | -1.341111                                                                                                                                 | -0.979391 | -2.108660 |              |
| O       | 0.925200                                                                                                                                  | -0.382522 | -1.935546 |              |
| C       | -1.610256                                                                                                                                 | -0.307704 | -0.866599 |              |
| C       | 0.666711                                                                                                                                  | 0.236924  | -0.666780 |              |
| O       | -0.449233                                                                                                                                 | -0.380741 | -0.023485 |              |
| C       | 1.892612                                                                                                                                  | 0.133286  | 0.213707  |              |
| C       | 0.099026                                                                                                                                  | -1.081263 | -4.036005 |              |
| C       | -2.750611                                                                                                                                 | -1.058373 | -0.208417 |              |
| Cl      | -1.230866                                                                                                                                 | -0.910408 | -5.272126 |              |
| Cl      | -3.321111                                                                                                                                 | -0.175706 | 1.283911  |              |
| Cl      | 2.366691                                                                                                                                  | -1.597206 | 0.565481  |              |
| H       | -0.523616                                                                                                                                 | 0.725156  | -2.957600 |              |
| H       | -1.857239                                                                                                                                 | 0.746956  | -1.076012 |              |

| Journal Name |                                                                                                                                           |           |           | ARTICLE   |
|--------------|-------------------------------------------------------------------------------------------------------------------------------------------|-----------|-----------|-----------|
| H            |                                                                                                                                           | 0.449989  | 1.308405  | -0.826989 |
| H            |                                                                                                                                           | 2.747060  | 0.600832  | -0.279174 |
| H            |                                                                                                                                           | 1.699140  | 0.609711  | 1.176954  |
| H            |                                                                                                                                           | 1.004350  | -0.665053 | -4.481086 |
| H            |                                                                                                                                           | 0.219500  | -2.148555 | -3.835193 |
| H            |                                                                                                                                           | -3.601437 | -1.115285 | -0.889667 |
| H            |                                                                                                                                           | -2.436500 | -2.055628 | 0.106965  |
| Cl           |                                                                                                                                           | -2.156816 | 2.922400  | -2.515061 |
| Complex      | $3 \cdots \text{Br}^-$ – BLYP–D3BJ/Def2–TZVP + CPCM(acetonitrile) – $r(\text{C} \cdots \text{H} \cdots \text{Anion}) = 3.5 \text{ \AA}$   |           |           |           |
| Atom         | X                                                                                                                                         |           | Y         | Z         |
| C            |                                                                                                                                           | -0.248224 | -0.343053 | -2.770369 |
| O            |                                                                                                                                           | -1.340750 | -1.001811 | -2.114446 |
| O            |                                                                                                                                           | 0.921017  | -0.388824 | -1.934312 |
| C            |                                                                                                                                           | -1.618038 | -0.338000 | -0.870540 |
| C            |                                                                                                                                           | 0.650118  | 0.237715  | -0.671324 |
| O            |                                                                                                                                           | -0.458220 | -0.393981 | -0.027033 |
| C            |                                                                                                                                           | 1.874466  | 0.161529  | 0.213315  |
| C            |                                                                                                                                           | 0.104709  | -1.096099 | -4.038184 |
| C            |                                                                                                                                           | -2.749931 | -1.103662 | -0.214448 |
| Cl           |                                                                                                                                           | -1.223713 | -0.926091 | -5.275658 |
| Cl           |                                                                                                                                           | -3.336391 | -0.226388 | 1.274122  |
| Cl           |                                                                                                                                           | 2.375965  | -1.558084 | 0.579583  |
| H            |                                                                                                                                           | -0.525815 | 0.706540  | -2.963350 |
| H            |                                                                                                                                           | -1.879426 | 0.714128  | -1.073254 |
| H            |                                                                                                                                           | 0.413510  | 1.303414  | -0.842909 |
| H            |                                                                                                                                           | 2.722346  | 0.639433  | -0.280924 |
| H            |                                                                                                                                           | 1.670193  | 0.642258  | 1.172174  |
| H            |                                                                                                                                           | 1.009713  | -0.676266 | -4.480424 |
| H            |                                                                                                                                           | 0.227782  | -2.163221 | -3.838303 |
| H            |                                                                                                                                           | -3.597521 | -1.173824 | -0.898329 |
| H            |                                                                                                                                           | -2.421522 | -2.095578 | 0.102902  |
| Br           |                                                                                                                                           | -2.057557 | 3.170199  | -2.473536 |
| Complex      | $3 \cdots \text{NO}_2^-$ – BLYP–D3BJ/Def2–TZVP + CPCM(acetonitrile) – $r(\text{C} \cdots \text{H} \cdots \text{Anion}) = 3.5 \text{ \AA}$ |           |           |           |
| Atom         | X                                                                                                                                         |           | Y         | Z         |
| C            |                                                                                                                                           | -0.843659 | 0.195663  | -2.477723 |
| O            |                                                                                                                                           | -1.586013 | -0.876556 | -1.883240 |
| O            |                                                                                                                                           | 0.430874  | 0.319712  | -1.849149 |
| C            |                                                                                                                                           | -1.747221 | -0.645153 | -0.479408 |
| C            |                                                                                                                                           | 0.256964  | 0.575183  | -0.455960 |
| O            |                                                                                                                                           | -0.468139 | -0.506926 | 0.154800  |
| C            |                                                                                                                                           | 1.596457  | 0.767316  | 0.211473  |
| C            |                                                                                                                                           | -0.672380 | -0.047938 | -3.960008 |
| C            |                                                                                                                                           | -2.415317 | -1.852314 | 0.151867  |
| Cl           |                                                                                                                                           | 0.243167  | -1.587923 | -4.322966 |
| Cl           |                                                                                                                                           | -4.146280 | -1.993934 | -0.404215 |
| Cl           |                                                                                                                                           | 2.692817  | -0.689323 | 0.039322  |
| H            |                                                                                                                                           | -1.403740 | 1.140894  | -2.345749 |
| H            |                                                                                                                                           | -2.330427 | 0.279063  | -0.327133 |
| H            |                                                                                                                                           | -0.316232 | 1.511777  | -0.333429 |
| H            |                                                                                                                                           | 2.102920  | 1.618320  | -0.253326 |
| H            |                                                                                                                                           | 1.459535  | 0.932688  | 1.282364  |
| H            |                                                                                                                                           | -1.648668 | -0.139393 | -4.439589 |
| H            |                                                                                                                                           | -0.103094 | 0.770301  | -4.405464 |
| H            |                                                                                                                                           | -1.906000 | -2.773770 | -0.138285 |
| H            |                                                                                                                                           | -2.435816 | -1.742272 | 1.237578  |
| O            |                                                                                                                                           | 0.154796  | 3.665278  | -1.450579 |
| N            |                                                                                                                                           | 1.113939  | 3.576943  | -2.288266 |
| O            |                                                                                                                                           | 2.271435  | 3.363918  | -1.790672 |
| Complex      | $4 \cdots \text{Cl}^-$ – BLYP–D3BJ/Def2–TZVP + CPCM(acetonitrile) – $r(\text{C} \cdots \text{H} \cdots \text{Anion}) = 3.5 \text{ \AA}$   |           |           |           |
| Atom         | X                                                                                                                                         |           | Y         | Z         |
| C            |                                                                                                                                           | -0.303804 | 0.192611  | -2.625864 |
| O            |                                                                                                                                           | -1.333192 | -0.579518 | -2.015632 |

| ARTICLE |                                                                                                                            |           |           | Journal Name |
|---------|----------------------------------------------------------------------------------------------------------------------------|-----------|-----------|--------------|
| O       | 0.904823                                                                                                                   | 0.122033  | -1.868598 |              |
| C       | -1.557905                                                                                                                  | -0.132593 | -0.673760 |              |
| C       | 0.664454                                                                                                                   | 0.547231  | -0.525683 |              |
| O       | -0.347007                                                                                                                  | -0.266247 | 0.079428  |              |
| C       | 1.932679                                                                                                                   | 0.396185  | 0.306201  |              |
| C       | 0.002198                                                                                                                   | -0.352542 | -4.020882 |              |
| C       | -2.594939                                                                                                                  | -1.073323 | -0.056778 |              |
| Cl      | 0.491130                                                                                                                   | -2.091477 | -3.977911 |              |
| Cl      | -2.867558                                                                                                                  | -0.640747 | 1.675138  |              |
| Cl      | 2.560389                                                                                                                   | -1.300199 | 0.300269  |              |
| Cl      | 3.188201                                                                                                                   | 1.554567  | -0.290927 |              |
| Cl      | -1.431868                                                                                                                  | -0.105461 | -5.094002 |              |
| Cl      | -4.138272                                                                                                                  | -0.972013 | -0.990269 |              |
| H       | -0.625519                                                                                                                  | 1.242141  | -2.722303 |              |
| H       | -1.887326                                                                                                                  | 0.919635  | -0.657167 |              |
| H       | 0.332979                                                                                                                   | 1.602061  | -0.505136 |              |
| H       | 1.728458                                                                                                                   | 0.654407  | 1.344656  |              |
| H       | 0.831687                                                                                                                   | 0.200845  | -4.460127 |              |
| H       | -2.262457                                                                                                                  | -2.111019 | -0.085779 |              |
| Cl      | -1.352809                                                                                                                  | 3.466712  | -0.119931 |              |
| Complex | 4 <sup>-</sup> Br <sup>-</sup> – BLYP–D3BJ/Def2–TZVP + CPCM(acetonitrile) – r(C–H <sup>⋯</sup> Anion) = 3.5 Å              |           |           |              |
| Atom    | X                                                                                                                          | Y         | Z         |              |
| C       | -0.302942                                                                                                                  | 0.191531  | -2.611408 |              |
| O       | -1.327689                                                                                                                  | -0.592378 | -2.007771 |              |
| O       | 0.908245                                                                                                                   | 0.108600  | -1.858206 |              |
| C       | -1.556042                                                                                                                  | -0.147314 | -0.667455 |              |
| C       | 0.672906                                                                                                                   | 0.528143  | -0.514303 |              |
| O       | -0.347212                                                                                                                  | -0.274838 | 0.090185  |              |
| C       | 1.940047                                                                                                                   | 0.361245  | 0.317524  |              |
| C       | -0.002314                                                                                                                  | -0.328349 | -4.016493 |              |
| C       | -2.593073                                                                                                                  | -1.086521 | -0.048082 |              |
| Cl      | 0.488936                                                                                                                   | -2.067121 | -4.005294 |              |
| Cl      | -2.871631                                                                                                                  | -0.640902 | 1.679575  |              |
| Cl      | 2.551715                                                                                                                   | -1.339927 | 0.299194  |              |
| Cl      | 3.204043                                                                                                                   | 1.513438  | -0.272172 |              |
| Cl      | -1.441286                                                                                                                  | -0.064267 | -5.078407 |              |
| Cl      | -4.132616                                                                                                                  | -0.995095 | -0.987483 |              |
| H       | -0.626598                                                                                                                  | 1.242679  | -2.683887 |              |
| H       | -1.891841                                                                                                                  | 0.902882  | -0.658918 |              |
| H       | 0.357430                                                                                                                   | 1.587014  | -0.493345 |              |
| H       | 1.736460                                                                                                                   | 0.614212  | 1.357471  |              |
| H       | 0.824611                                                                                                                   | 0.233804  | -4.449391 |              |
| H       | -2.257149                                                                                                                  | -2.123296 | -0.068500 |              |
| Br      | -1.409310                                                                                                                  | 3.665953  | -0.282823 |              |
| Complex | 4 <sup>-</sup> NO <sub>2</sub> <sup>-</sup> – BLYP–D3BJ/Def2–TZVP + CPCM(acetonitrile) – r(C–H <sup>⋯</sup> Anion) = 3.5 Å |           |           |              |
| Atom    | X                                                                                                                          | Y         | Z         |              |
| C       | -0.304805                                                                                                                  | 0.271790  | -2.650087 |              |
| O       | -1.287277                                                                                                                  | -0.538137 | -2.008645 |              |
| O       | 0.908261                                                                                                                   | 0.287667  | -1.892364 |              |
| C       | -1.542656                                                                                                                  | -0.030531 | -0.694706 |              |
| C       | 0.656321                                                                                                                   | 0.744759  | -0.564115 |              |
| O       | -0.332143                                                                                                                  | -0.073527 | 0.072466  |              |
| C       | 1.930828                                                                                                                   | 0.650745  | 0.269752  |              |
| C       | 0.030054                                                                                                                   | -0.295660 | -4.027196 |              |
| C       | -2.543410                                                                                                                  | -0.976998 | -0.029886 |              |
| Cl      | 0.607988                                                                                                                   | -2.006868 | -3.940155 |              |
| Cl      | -2.852631                                                                                                                  | -0.449539 | 1.670297  |              |
| Cl      | 2.600337                                                                                                                   | -1.028119 | 0.312497  |              |
| Cl      | 3.155152                                                                                                                   | 1.822267  | -0.364870 |              |
| Cl      | -1.413880                                                                                                                  | -0.149914 | -5.106323 |              |
| Cl      | -4.079850                                                                                                                  | -1.003349 | -0.978863 |              |
| H       | -0.690324                                                                                                                  | 1.297714  | -2.767597 |              |



|   |           |           |           |
|---|-----------|-----------|-----------|
| H | -1.917414 | 1.004610  | -0.755111 |
| H | 0.307574  | 1.792363  | -0.569284 |
| H | 1.721409  | 0.934778  | 1.300455  |
| H | 0.830716  | 0.287253  | -4.481262 |
| H | -2.165264 | -1.998573 | 0.008941  |
| O | -1.918042 | 3.069625  | -1.927111 |
| N | -1.140175 | 3.964869  | -1.447534 |
| O | -0.705404 | 3.747224  | -0.267663 |

| Complex |           | 5 <sup>••</sup> -Cl <sup>-</sup> – BLYP–D3BJ/Def2–TZVP + CPCM(acetonitrile) – r(C–H <sup>••</sup> –Anion) = 3.5 Å |           |  |
|---------|-----------|-------------------------------------------------------------------------------------------------------------------|-----------|--|
| Atom    | X         | Y                                                                                                                 | Z         |  |
| C       | -0.407913 | 0.233076                                                                                                          | -2.552786 |  |
| O       | -1.394270 | -0.622454                                                                                                         | -1.974343 |  |
| O       | 0.810559  | 0.129660                                                                                                          | -1.824711 |  |
| C       | -1.615976 | -0.266534                                                                                                         | -0.616088 |  |
| C       | 0.577281  | 0.542040                                                                                                          | -0.482319 |  |
| O       | -0.403626 | -0.298913                                                                                                         | 0.125415  |  |
| C       | 1.893764  | 0.388774                                                                                                          | 0.309297  |  |
| C       | -0.153604 | -0.236686                                                                                                         | -4.001184 |  |
| C       | -2.581756 | -1.309313                                                                                                         | 0.001881  |  |
| Cl      | 0.424244  | -1.944310                                                                                                         | -4.041739 |  |
| Cl      | -2.887180 | -0.847816                                                                                                         | 1.719970  |  |
| Cl      | 2.464130  | -1.321846                                                                                                         | 0.301592  |  |
| Cl      | 3.137646  | 1.451985                                                                                                          | -0.447144 |  |
| Cl      | 1.598295  | 0.926067                                                                                                          | 2.008273  |  |
| Cl      | -1.700318 | -0.093881                                                                                                         | -4.922035 |  |
| Cl      | 1.085366  | 0.846225                                                                                                          | -4.737833 |  |
| Cl      | -4.134497 | -1.259265                                                                                                         | -0.916582 |  |
| Cl      | -1.879128 | -2.963327                                                                                                         | -0.073263 |  |
| H       | -0.748516 | 1.283537                                                                                                          | -2.562181 |  |
| H       | -2.089933 | 0.724110                                                                                                          | -0.546608 |  |
| H       | 0.260350  | 1.600729                                                                                                          | -0.468860 |  |
| Cl      | -0.554236 | 3.659733                                                                                                          | -1.675216 |  |

| Complex |           | 5 <sup>••</sup> -Cl <sup>-</sup> – ZORA–BLYP–D3BJ/TZ2P – r(C–H <sup>••</sup> –Anion) = 3.5 Å |           |  |
|---------|-----------|----------------------------------------------------------------------------------------------|-----------|--|
| Atom    | X         | Y                                                                                            | Z         |  |
| C       | -0.399450 | 0.262852                                                                                     | -2.550496 |  |
| O       | -1.430112 | -0.561504                                                                                    | -1.974659 |  |
| O       | 0.806642  | 0.088710                                                                                     | -1.816355 |  |
| C       | -1.635302 | -0.242614                                                                                    | -0.607651 |  |
| C       | 0.577232  | 0.565555                                                                                     | -0.495392 |  |
| O       | -0.427864 | -0.249215                                                                                    | 0.136485  |  |
| C       | 1.877235  | 0.414281                                                                                     | 0.314065  |  |
| C       | -0.170267 | -0.216987                                                                                    | -3.994925 |  |
| C       | -2.556363 | -1.344360                                                                                    | -0.006694 |  |
| Cl      | 0.322142  | -1.968599                                                                                    | -4.049411 |  |
| Cl      | -2.874542 | -0.937151                                                                                    | 1.730866  |  |
| Cl      | 2.428370  | -1.319632                                                                                    | 0.380487  |  |
| Cl      | 3.152633  | 1.424262                                                                                     | -0.456732 |  |
| Cl      | 1.575697  | 1.006255                                                                                     | 1.999629  |  |
| Cl      | -1.712958 | -0.004090                                                                                    | -4.921017 |  |
| Cl      | 1.118504  | 0.796271                                                                                     | -4.738399 |  |
| Cl      | -4.127826 | -1.331297                                                                                    | -0.909987 |  |
| Cl      | -1.798496 | -2.971492                                                                                    | -0.123705 |  |
| H       | -0.681709 | 1.338754                                                                                     | -2.547065 |  |
| H       | -2.162036 | 0.715710                                                                                     | -0.499798 |  |
| H       | 0.275707  | 1.635822                                                                                     | -0.536350 |  |
| Cl      | -0.456555 | 3.520058                                                                                     | -1.709361 |  |

| Complex |           | 5 <sup>••</sup> -Br <sup>-</sup> – BLYP–D3BJ/Def2–TZVP + CPCM(acetonitrile) – r(C–H <sup>••</sup> –Anion) = 3.5 Å |           |  |
|---------|-----------|-------------------------------------------------------------------------------------------------------------------|-----------|--|
| Atom    | X         | Y                                                                                                                 | Z         |  |
| C       | -0.357725 | 0.234809                                                                                                          | -2.573933 |  |
| O       | -1.319737 | -0.472540                                                                                                         | -1.794008 |  |
| O       | 0.945308  | 0.051735                                                                                                          | -2.029839 |  |
| C       | -1.287552 | -0.015543                                                                                                         | -0.447953 |  |

| ARTICLE |                                                                                                      |           |   | Journal Name |
|---------|------------------------------------------------------------------------------------------------------|-----------|---|--------------|
| C       | 0.964727                                                                                             | 0.544750  |   | -0.694699    |
| O       | 0.015445                                                                                             | -0.159531 |   | 0.103227     |
| C       | 2.369378                                                                                             | 0.297661  |   | -0.102617    |
| C       | -0.375649                                                                                            | -0.344088 |   | -4.004965    |
| C       | -2.261639                                                                                            | -0.887780 |   | 0.381811     |
| Cl      | 0.019734                                                                                             | -2.101867 |   | -4.001045    |
| Cl      | -3.920303                                                                                            | -0.688858 |   | -0.301055    |
| Cl      | 2.766157                                                                                             | -1.459376 |   | -0.082238    |
| Cl      | 3.572796                                                                                             | 1.186844  |   | -1.109026    |
| Cl      | 2.394106                                                                                             | 0.952130  |   | 1.579955     |
| Cl      | -2.024275                                                                                            | -0.088728 |   | -4.695553    |
| Cl      | 0.834628                                                                                             | 0.555496  |   | -4.993581    |
| Cl      | -2.239572                                                                                            | -0.294440 |   | 2.085644     |
| Cl      | -1.780116                                                                                            | -2.619886 |   | 0.329115     |
| H       | -0.599972                                                                                            | 1.311126  |   | -2.614098    |
| H       | -1.620081                                                                                            | 1.031805  |   | -0.385326    |
| H       | 0.753135                                                                                             | 1.628400  |   | -0.691931    |
| Br      | -0.234219                                                                                            | 3.890013  |   | -1.855032    |
| Complex | 5...NO <sub>2</sub> <sup>-</sup> - BLYP-D3BJ/Def2-TZVP + CPCM(acetonitrile) - r(C-H...Anion) = 3.5 Å |           |   |              |
| Atom    | X                                                                                                    | Y         | Z |              |
| C       | -0.324666                                                                                            | 0.281591  |   | -2.664265    |
| O       | -1.318772                                                                                            | -0.507302 |   | -2.019546    |
| O       | 0.881677                                                                                             | 0.283971  |   | -1.908622    |
| C       | -1.550024                                                                                            | -0.002630 |   | -0.704255    |
| C       | 0.641305                                                                                             | 0.750757  |   | -0.582006    |
| O       | -0.346392                                                                                            | -0.053621 |   | 0.055124     |
| C       | 1.959565                                                                                             | 0.619780  |   | 0.213213     |
| C       | -0.024308                                                                                            | -0.350287 |   | -4.044115    |
| C       | -2.597626                                                                                            | -0.904545 |   | -0.018454    |
| Cl      | 0.578740                                                                                             | -2.037315 |   | -3.869005    |
| Cl      | -2.896535                                                                                            | -0.261593 |   | 1.641174     |
| Cl      | 2.527704                                                                                             | -1.089879 |   | 0.256572     |
| Cl      | 3.204032                                                                                             | 1.658732  |   | -0.581760    |
| Cl      | -1.546941                                                                                            | -0.340163 |   | -5.013467    |
| Cl      | -4.126183                                                                                            | -0.827395 |   | -0.975301    |
| H       | -0.694449                                                                                            | 1.307556  |   | -2.815023    |
| H       | -1.926639                                                                                            | 1.033557  |   | -0.758769    |
| H       | 0.323296                                                                                             | 1.808068  |   | -0.579824    |
| Cl      | 1.670786                                                                                             | 1.211280  |   | 1.893169     |
| Cl      | 1.219327                                                                                             | 0.663617  |   | -4.870872    |
| Cl      | -2.025176                                                                                            | -2.611494 |   | 0.081453     |
| O       | -1.920406                                                                                            | 3.016129  |   | -1.887976    |
| N       | -1.197486                                                                                            | 3.957033  |   | -1.407590    |
| O       | -0.655464                                                                                            | 3.718598  |   | -0.278221    |

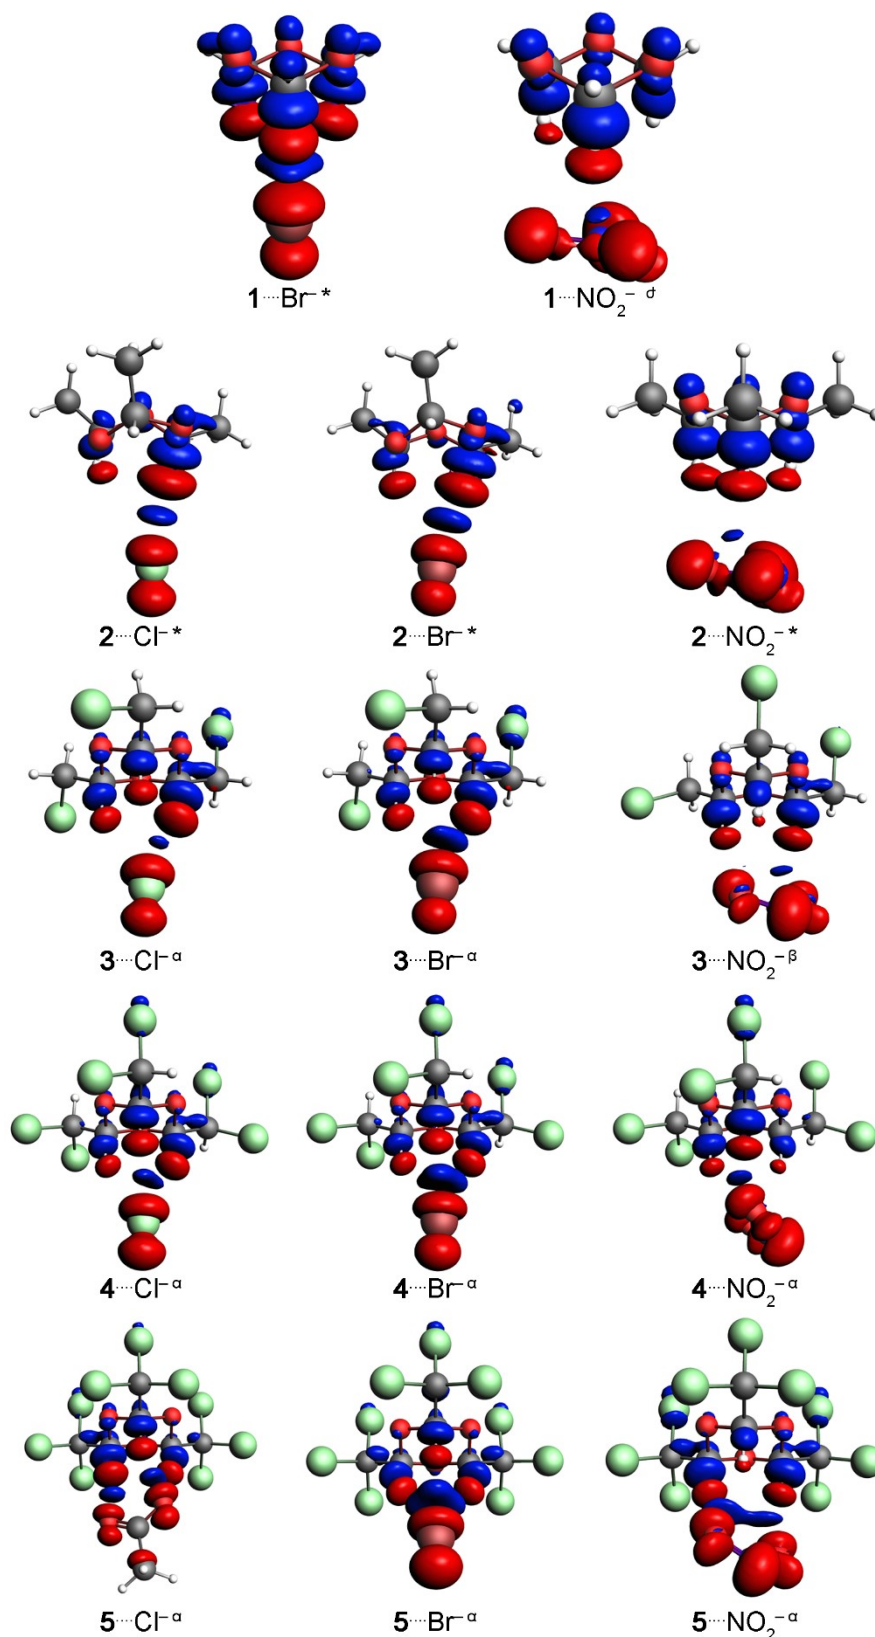

**Figure S1.** The first density deformation channel surface plots,  $\Delta\rho_s$ , with isovalue:  $^{\alpha} = 0.0010$ ;  $^{\beta} = 0.0008$ ;  $^d = 0.0006$ ; and  $^* = 0.0005$  a.u., to complexes **1**...( $\text{Br}^-$  and  $\text{NO}_2^-$ ) and (**2**–**5**)...( $\text{Cl}^-$ ,  $\text{Br}^-$  and  $\text{NO}_2^-$ ), where the red and blue regions indicate the electronic density outflow and inflow, respectively. Atoms color code: H = white; C = gray; N = blue; O = red; Cl = green; and Br = brown.

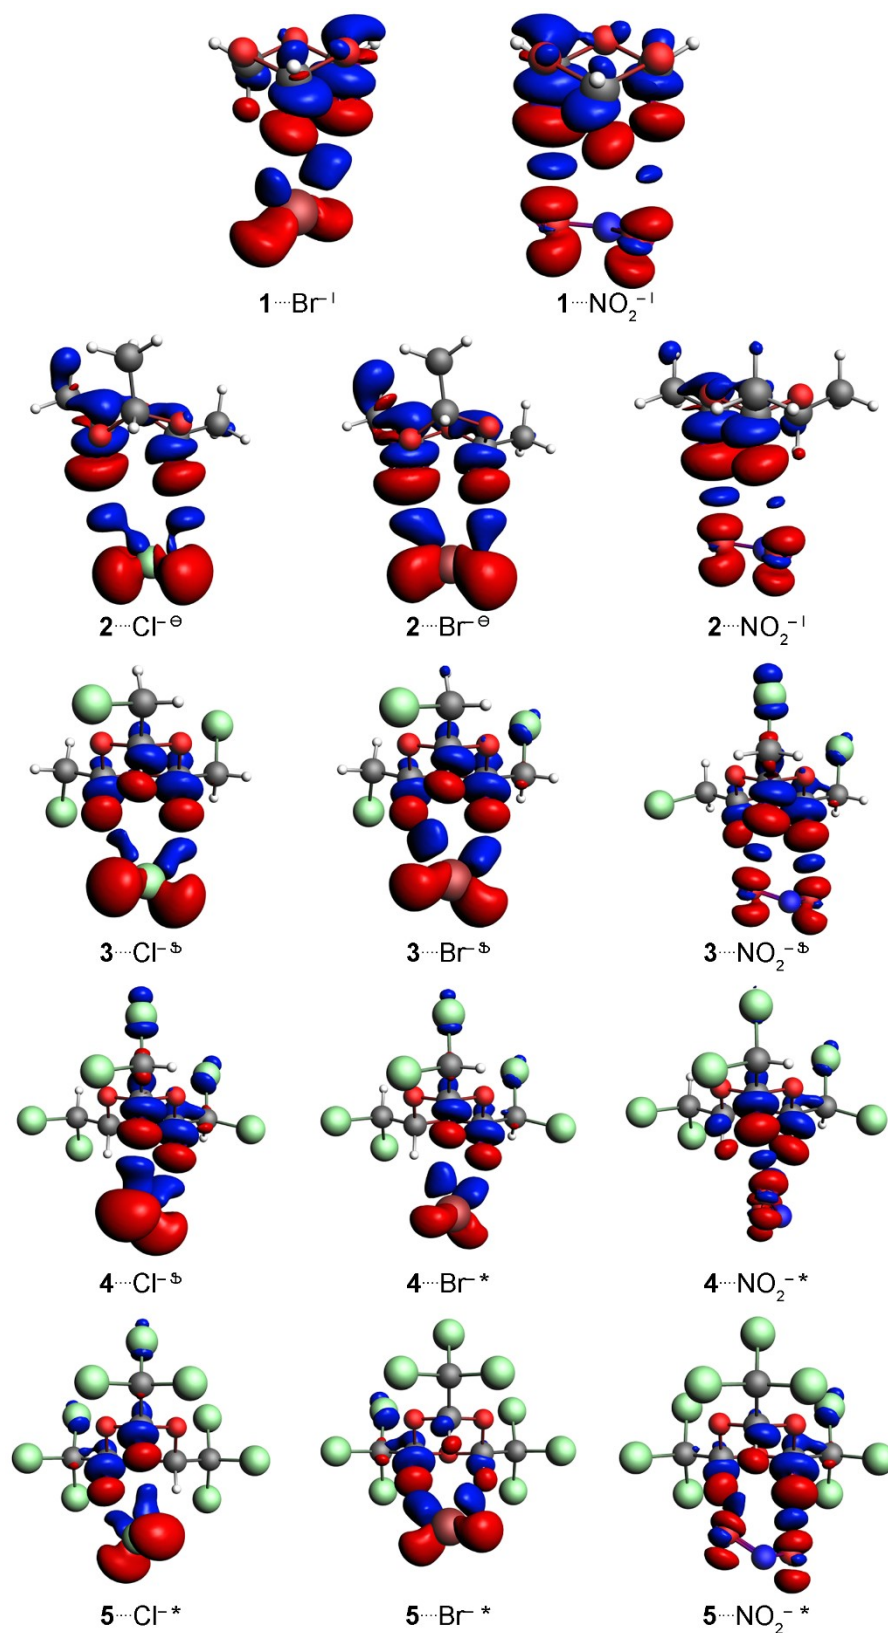

**Figure S2.** The second density deformation channel surface plots,  $\Delta\rho_2$ , with isovalue:  $^* = 0.0005$ ;  $^b = 0.0003$ ;  $^l = 0.0002$ ; and  $^e = 0.0001$  a.u., to complexes  $1\cdots(\text{Br}^-$  and  $\text{NO}_2^-)$  and  $(2-5)\cdots(\text{Cl}^-, \text{Br}^-$  and  $\text{NO}_2^-)$ , where the red and blue regions indicate the electronic density outflow and inflow, respectively. Atoms color code: H = white; C = gray; N = blue; O = red; Cl = green; and Br = brown.

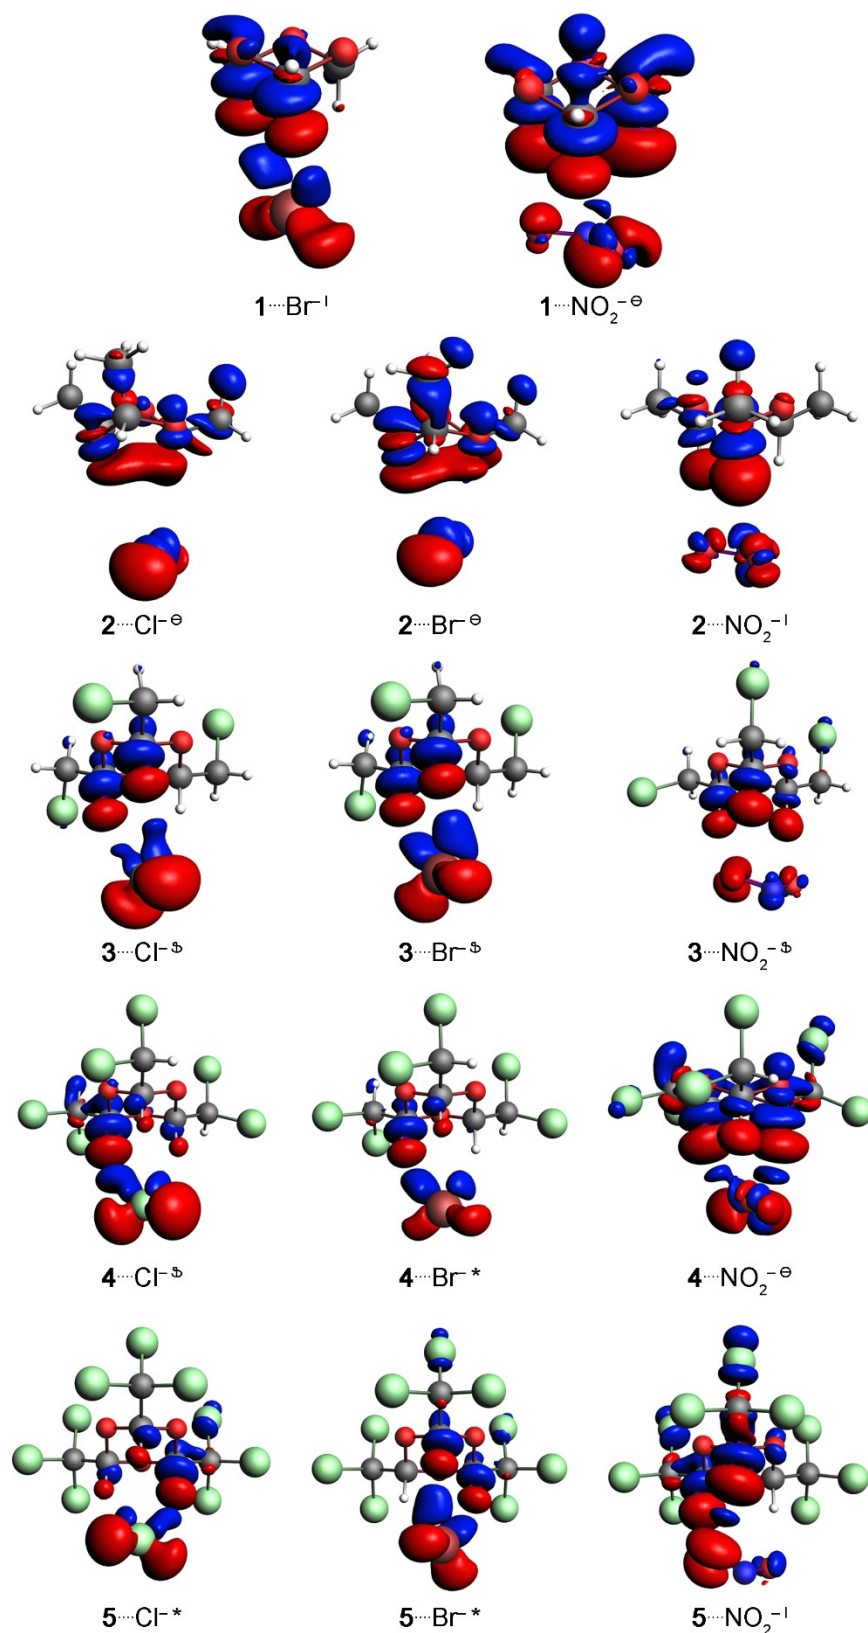

**Figure S3.** The third density deformation channel surface plots,  $\Delta\rho_3$ , with isovalue: \* = 0.0005; <sup>b</sup> = 0.0003; <sup>I</sup> = 0.0002; and <sup>e</sup> = 0.0001 a.u., to complexes 1...(Cl<sup>-</sup>, Br<sup>-</sup> and NO<sub>2</sub><sup>-</sup>) and (2–5)...(AcO<sup>-</sup>, Cl<sup>-</sup>, Br<sup>-</sup> and NO<sub>2</sub><sup>-</sup>), where the red and blue regions indicate the electronic density outflow and inflow, respectively. Atoms color code: H = white; C = gray; N = blue; O = red; Cl = green; and Br = brown.

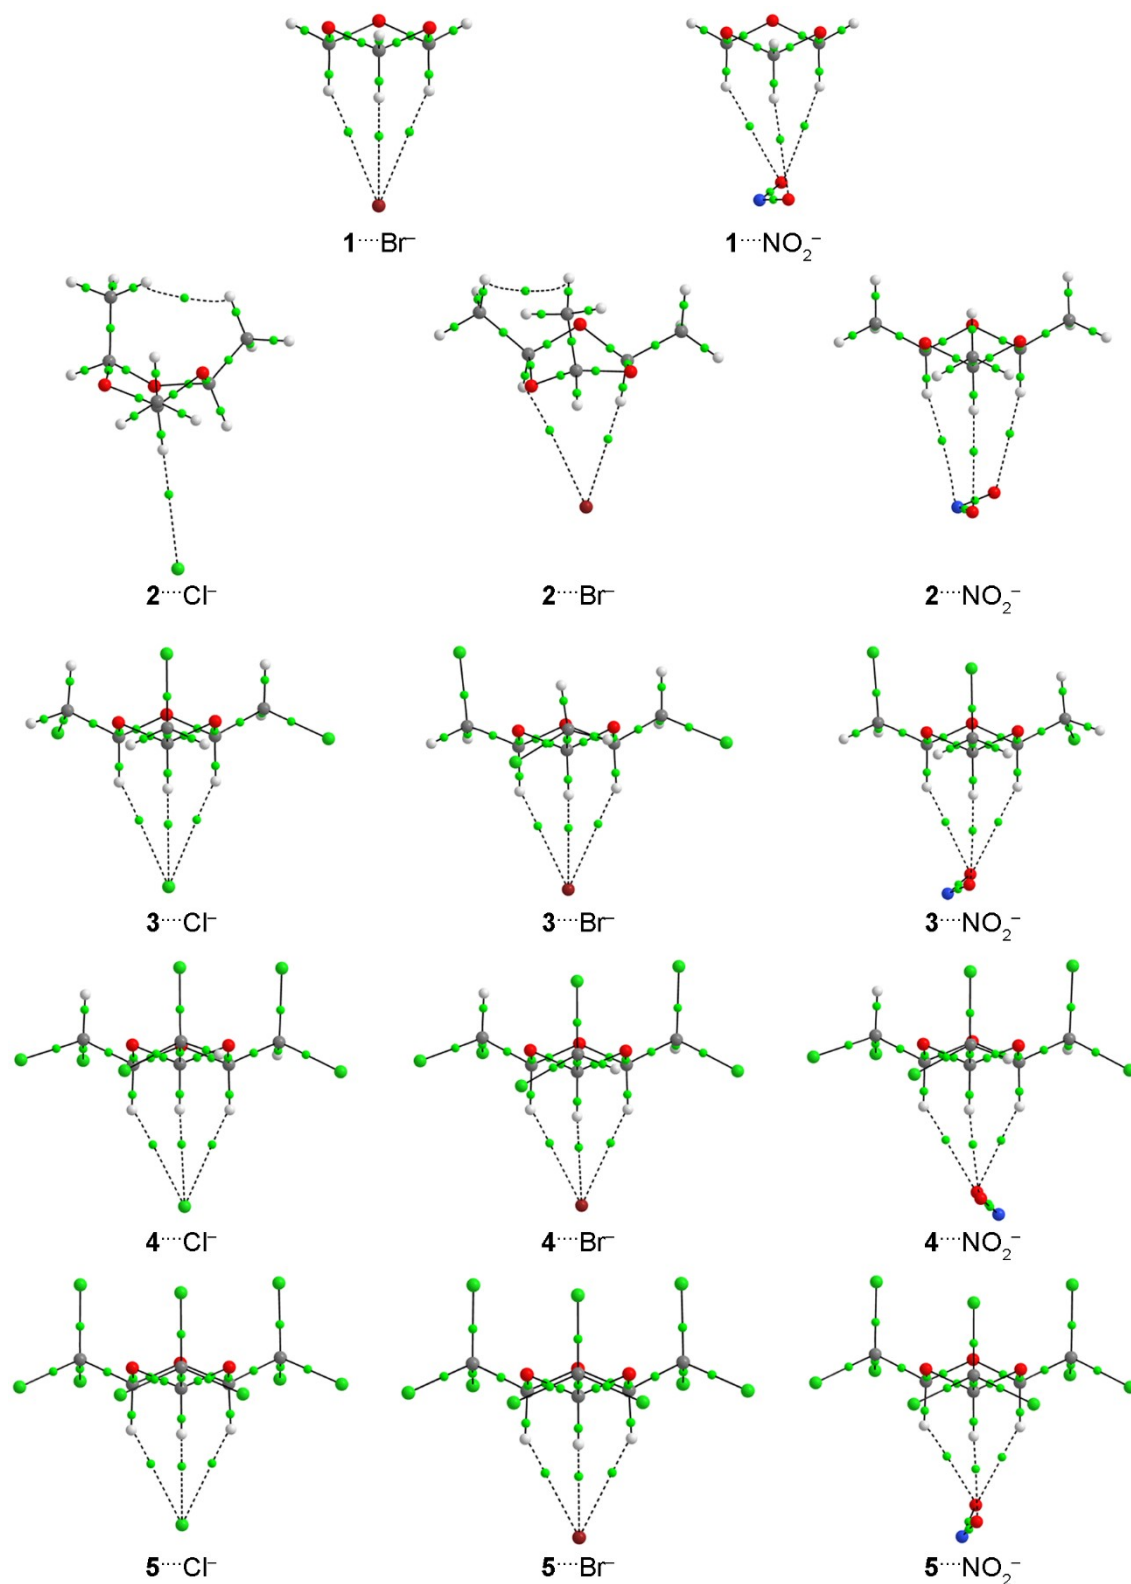

**Figure S4.** Topological map containing the bond paths (continuous or dashed lines connecting the cores) and bond critical points (small light green points), for the complexes  $1 \cdots (\text{Br}^- \text{ and } \text{NO}_2^-)$  and  $(2-5) \cdots (\text{Cl}^-, \text{Br}^- \text{ and } \text{NO}_2^-)$ . Atoms color code: H = white; C = gray; N = blue; O = red; Cl = green; and Br = brown.

**Table S2.** Ratio between the kinetic electron energy density,  $G_b$ , and potential electron energy density,  $V_b$ ,  $-G_b/V_b$ , and electron density,  $\rho_b$ , at BCPs related to interactions between the receptors (1–5) and anions ( $\text{Cl}^-$ ,  $\text{Br}^-$  and  $\text{NO}_2^-$ ). The values of all the parameters are in a.u.

| Complex                          | BCP                   | $-G_b/V_b$ | $\rho_b$ |
|----------------------------------|-----------------------|------------|----------|
| 1...Cl <sup>-</sup>              | C–H...Cl <sup>-</sup> | 1.425      | 0.005    |
|                                  |                       | 1.412      | 0.006    |
|                                  |                       | 1.424      | 0.005    |
| 1...Br <sup>-</sup>              | C–H...Br <sup>-</sup> | 1.278      | 0.008    |
|                                  |                       | 1.279      | 0.008    |
|                                  |                       | 1.277      | 0.008    |
| 1...NO <sub>2</sub> <sup>-</sup> | C–H...O <sup>-</sup>  | 1.208      | 0.007    |
|                                  |                       | 1.366      | 0.005    |
|                                  |                       | 1.206      | 0.007    |
| 2...Cl <sup>-</sup>              | C–H...Cl <sup>-</sup> | 1.389      | 0.006    |
|                                  |                       | 1.314      | 0.005    |
|                                  |                       | 1.215      | 0.011    |
| 2...Br <sup>-</sup>              | C–H...Br <sup>-</sup> | 1.230      | 0.006    |
|                                  |                       | 1.199      | 0.007    |
|                                  |                       | 1.434      | 0.004    |
| 2...NO <sub>2</sub> <sup>-</sup> | C–H...O <sup>-</sup>  | 1.353      | 0.008    |
|                                  |                       | 1.351      | 0.008    |
|                                  |                       | 1.277      | 0.010    |
| 3...Cl <sup>-</sup>              | C–H...Cl <sup>-</sup> | 1.219      | 0.011    |
|                                  |                       | 1.225      | 0.011    |
|                                  |                       | 1.189      | 0.012    |
| 3...Br <sup>-</sup>              | C–H...Br <sup>-</sup> | 1.145      | 0.009    |
|                                  |                       | 1.136      | 0.009    |
|                                  |                       | 1.036      | 0.013    |
| 3...NO <sub>2</sub> <sup>-</sup> | C–H...O <sup>-</sup>  | 1.239      | 0.011    |
|                                  |                       | 1.313      | 0.009    |
|                                  |                       | 1.264      | 0.010    |
| 4...Cl <sup>-</sup>              | C–H...Cl <sup>-</sup> | 1.170      | 0.014    |
|                                  |                       | 1.192      | 0.012    |
|                                  |                       | 1.162      | 0.014    |
| 4...Br <sup>-</sup>              | C–H...Br <sup>-</sup> | 1.098      | 0.010    |
|                                  |                       | 1.074      | 0.012    |
|                                  |                       | 0.992      | 0.017    |
| 4...NO <sub>2</sub> <sup>-</sup> | C–H...O <sup>-</sup>  | 1.219      | 0.012    |
|                                  |                       | 1.219      | 0.012    |
|                                  |                       | 1.240      | 0.011    |
| 5...Cl <sup>-</sup>              | C–H...Cl <sup>-</sup> | 1.147      | 0.015    |
|                                  |                       | 1.146      | 0.015    |
|                                  |                       | 1.149      | 0.015    |
| 5...Br <sup>-</sup>              | C–H...Br <sup>-</sup> | 1.079      | 0.012    |
|                                  |                       | 0.995      | 0.017    |
|                                  |                       | 0.981      | 0.020    |
| 5...NO <sub>2</sub> <sup>-</sup> | C–H...O <sup>-</sup>  |            |          |
|                                  |                       |            |          |
|                                  |                       |            |          |



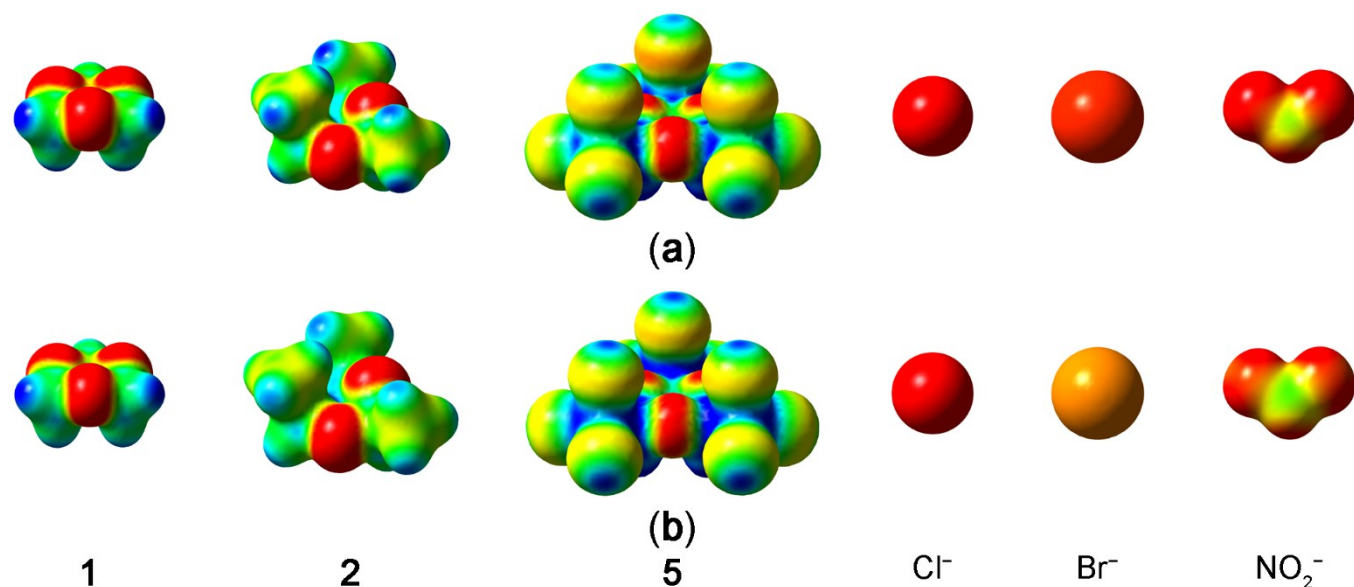

**Figure S5.** Electrostatic potential surfaces mapped in an electronic density of 0.020 a.u.: i) [0.000 a.u. (red) to 0.150 a.u. (blue)] to receptors (1, 2 and 5); and ii) [-0.250 a.u. (red) to 0.000 a.u. (blue)] to anions (Cl<sup>-</sup>, Br<sup>-</sup> and NO<sub>2</sub><sup>-</sup>) using the: (a) B97D3/Def2-TZVP + PCM (acetonitrile); and (b) B97D3/6-31+G(d), theory level.

**Table S3.** Difference between the sum of the atomic charges of the three main hydrogen atoms (highlighted in the blue color in the Scheme 1) and the anion charge,  $q_b$  / a.u., through of the: (a) B97D3/Def2-TZVP + PCM (acetonitrile); and (b) B97D3/6-31+G(d), theory level.

| Complex                          | $q_b$ from B97D3/Def2-TZVP + PCM (acetonitrile) | $q_b$ from B97D3/6-31+G(d) |
|----------------------------------|-------------------------------------------------|----------------------------|
| 1...Cl <sup>-</sup>              | 0.913                                           | 1.003                      |
| 1...Br <sup>-</sup>              | 0.964                                           | 1.021                      |
| 1...NO <sub>2</sub> <sup>-</sup> | 0.928                                           | 0.964                      |
| 2...Cl <sup>-</sup>              | 0.752                                           | 0.875                      |
| 5...Cl <sup>-</sup>              | 1.217                                           | 1.189                      |

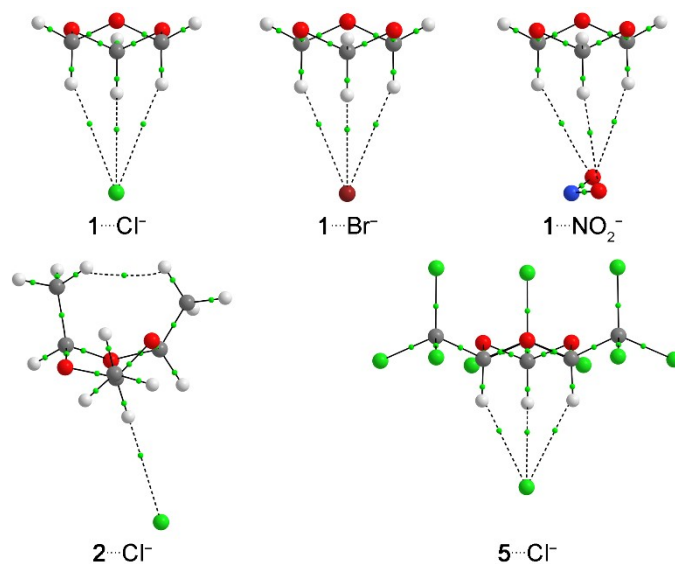

**Figure S6.** Topological map containing the bond paths (continuous or dashed lines connecting the cores) and bond critical points (small light green points), for the complexes 1...Cl<sup>-</sup>, Br<sup>-</sup> and NO<sub>2</sub><sup>-</sup>) and (2 and 5)...Cl<sup>-</sup> using the B97D3/Def2-TZVP + PCM (acetonitrile) computational model. Atoms color code: H = white; C = gray; N = blue; O = red; Cl = green; and Br = brown.



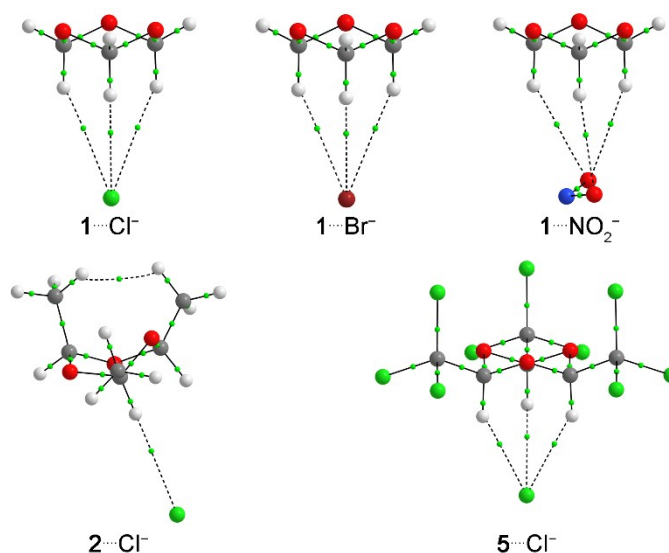

**Figure S7.** Topological map containing the bond paths (continuous or dashed lines connecting the cores) and bond critical points (small light green points), for the complexes  $1\cdots(\text{Cl}^-, \text{Br}^- \text{ and } \text{NO}_2^-)$  and ( $2$  and  $5$ ) $\cdots\text{Cl}^-$  using the B97D3/6–31+G(d) theory level. Atoms color code: H = white; C = gray; N = blue; O = red; Cl = green; and Br = brown.

**Table S4.** Ratio between the kinetic electron energy density,  $G_b$ , and potential electron energy density,  $V_b$ ,  $-G_b/V_b$ , and electron density,  $\rho_b$ , at BCPs related to interactions present in the complexes  $1\cdots(\text{Cl}^-, \text{Br}^- \text{ and } \text{NO}_2^-)$ ,  $2\cdots\text{Cl}^-$  and  $5\cdots\text{Cl}^-$  through of the: (a) B97D3/Def2–TZVP + PCM (acetonitrile); and (b) B97D3/6–31+G(d), theory level. The values of all the parameters are in a.u.

| Computational Model    |                         | B97D3/Def2–TZVP + PCM (acetonitrile) |          | B97D3/6–31+G(d) |          |
|------------------------|-------------------------|--------------------------------------|----------|-----------------|----------|
| Complex                | BCP                     | $-G_b/V_b$                           | $\rho_b$ | $-G_b/V_b$      | $\rho_b$ |
| $1\cdots\text{Cl}^-$   | C–H $\cdots\text{Cl}^-$ | 1.225                                | 0.006    | 1.432           | 0.005    |
|                        |                         | 1.223                                | 0.006    | 1.419           | 0.006    |
|                        |                         | 1.225                                | 0.006    | 1.431           | 0.005    |
| $1\cdots\text{Br}^-$   | C–H $\cdots\text{Br}^-$ | 1.182                                | 0.008    | 1.272           | 0.008    |
|                        |                         | 1.182                                | 0.008    | 1.274           | 0.008    |
|                        |                         | 1.181                                | 0.008    | 1.272           | 0.008    |
| $1\cdots\text{NO}_2^-$ | C–H $\cdots\text{O}^-$  | 1.286                                | 0.007    | 1.219           | 0.007    |
|                        |                         | 1.384                                | 0.005    | 1.380           | 0.005    |
|                        |                         | 1.326                                | 0.007    | 1.212           | 0.007    |
| $2\cdots\text{Cl}^-$   | C–H $\cdots\text{Cl}^-$ | 1.215                                | 0.007    | 1.414           | 0.006    |
|                        |                         | 1.247                                | 0.012    | 1.209           | 0.012    |
| $5\cdots\text{Cl}^-$   | C–H $\cdots\text{Cl}^-$ | 1.247                                | 0.012    | 1.209           | 0.012    |
|                        |                         | 1.252                                | 0.012    | 1.230           | 0.012    |
