# Supplementary material for: Design of supramolecular systems capable of recognizing anions uniquely by aliphatic C–H⋯anion hydrogen bonds: theoretical insights
Source: Royal Society of Chemistry journal article supplement (doi:10.1039/d1nj03320d), 2021-01-01
Supplement: d1nj03320d3.pdf [file d1nj03320d3.pdf]

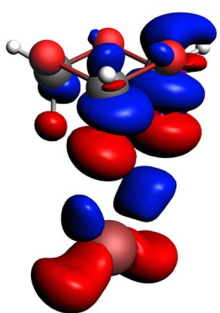

1...Br<sup>-1</sup>

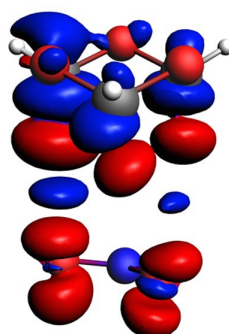

1...NO<sub>2</sub><sup>-1</sup>

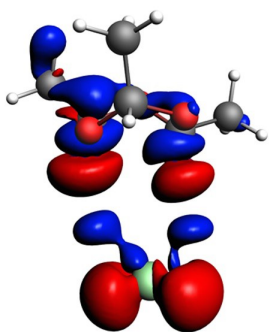

2...Cl<sup>-e</sup>

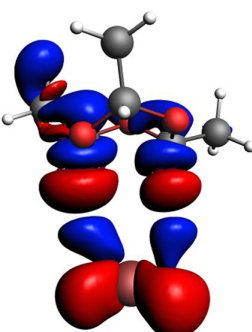

2...Br<sup>-e</sup>

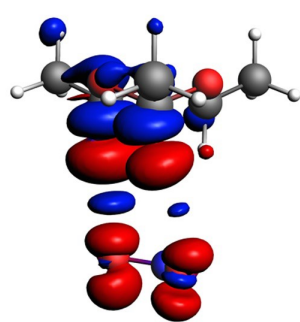

2...NO<sub>2</sub><sup>-1</sup>

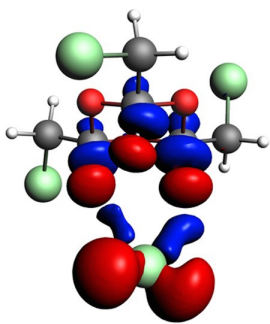

3...Cl<sup>-phi</sup>

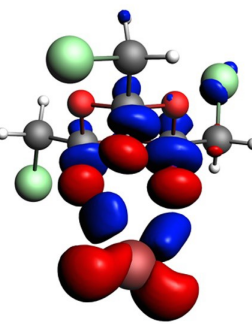

3...Br<sup>-phi</sup>

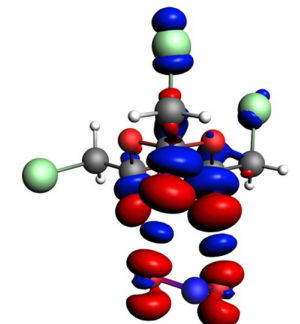

3...NO<sub>2</sub><sup>-phi</sup>

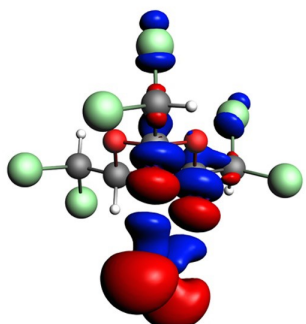

4...Cl<sup>-phi</sup>

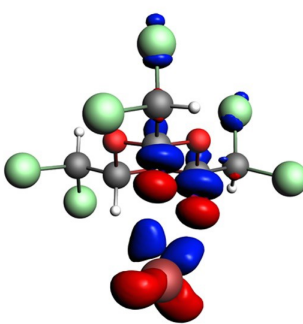

4...Br<sup>-\*</sup>

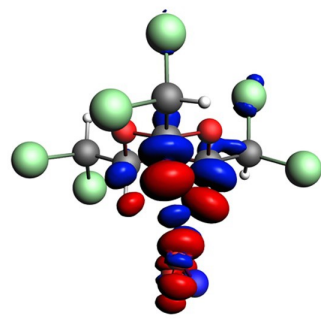

4...NO<sub>2</sub><sup>-\*</sup>

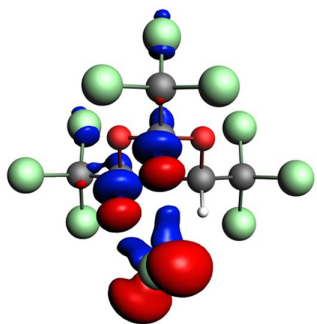

5...Cl<sup>-\*</sup>

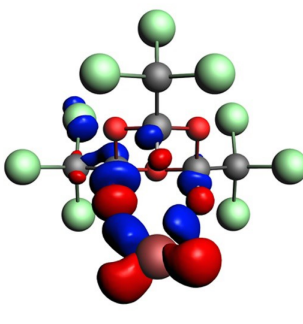

5...Br<sup>-\*</sup>

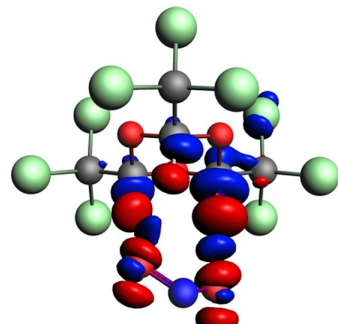

5...NO<sub>2</sub><sup>-\*</sup>
