# Supplementary figures and images for: Design of supramolecular systems capable of recognizing anions uniquely by aliphatic C–H⋯anion hydrogen bonds: theoretical insights
Source: Royal Society of Chemistry journal article supplement (doi:10.1039/d1nj03320d), 2021-01-01

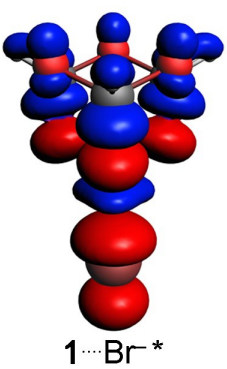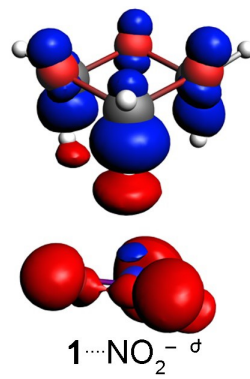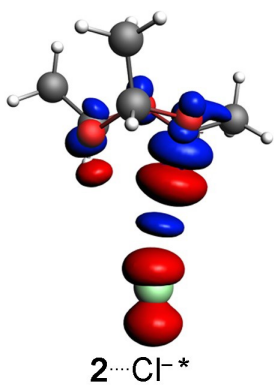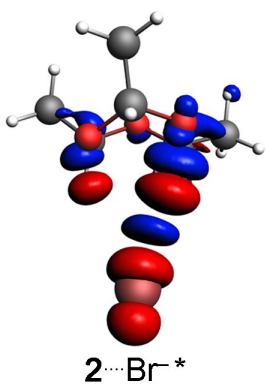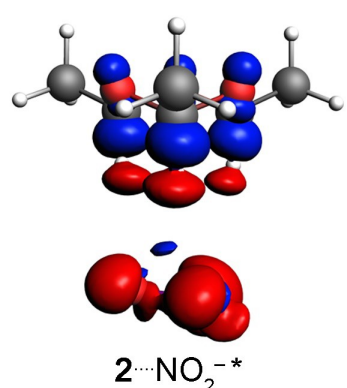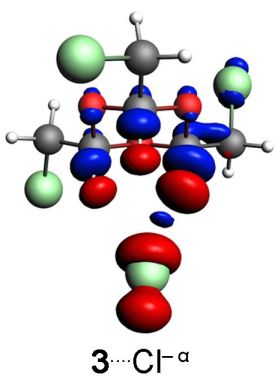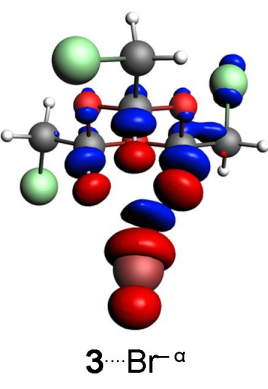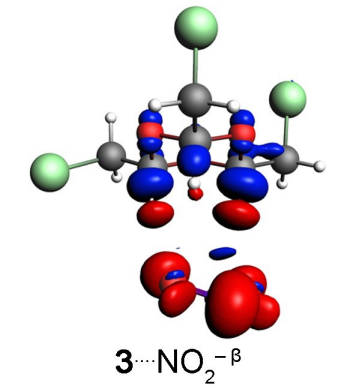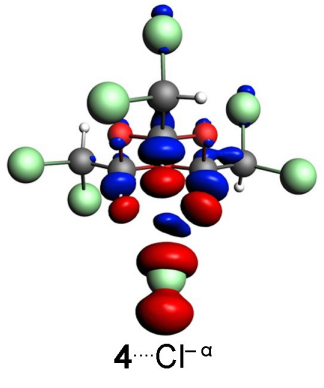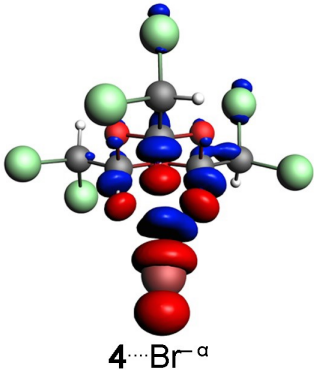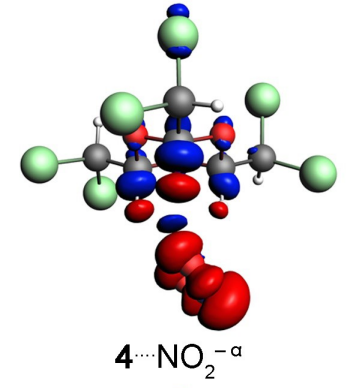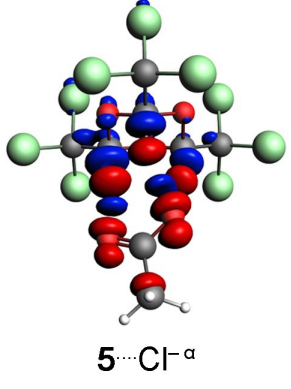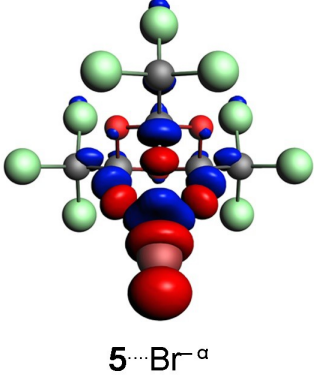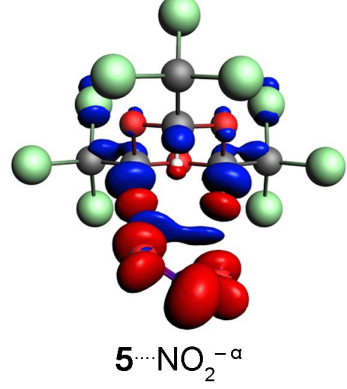

Supplement: d1nj03320d2.pdf [file d1nj03320d2.pdf]

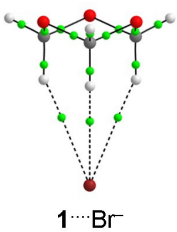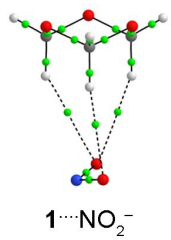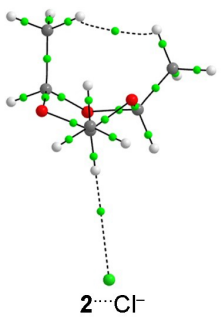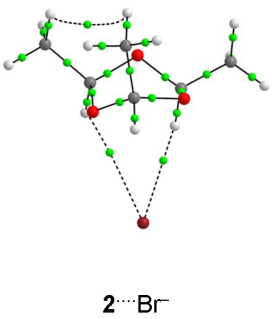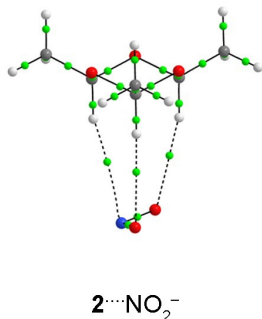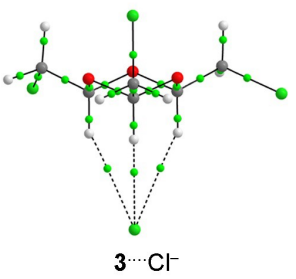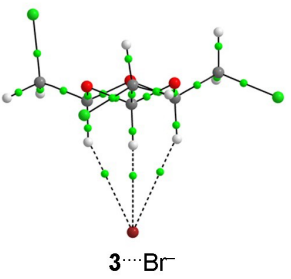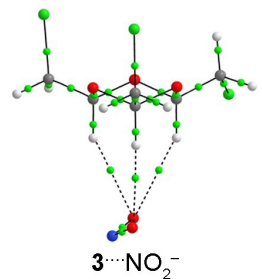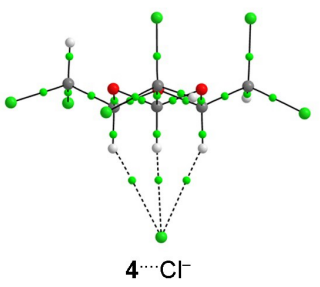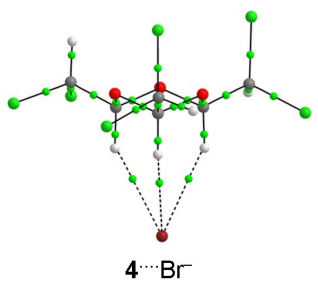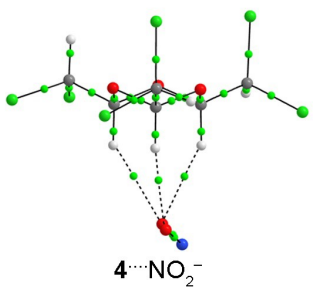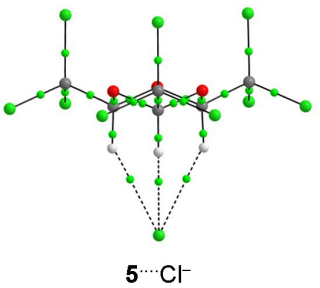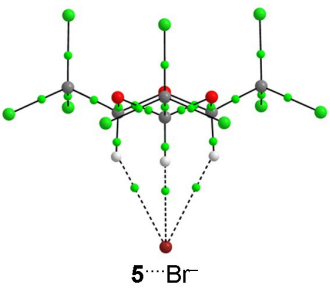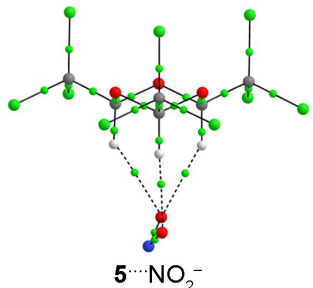

Supplement: d1nj03320d5.pdf [file d1nj03320d5.pdf]

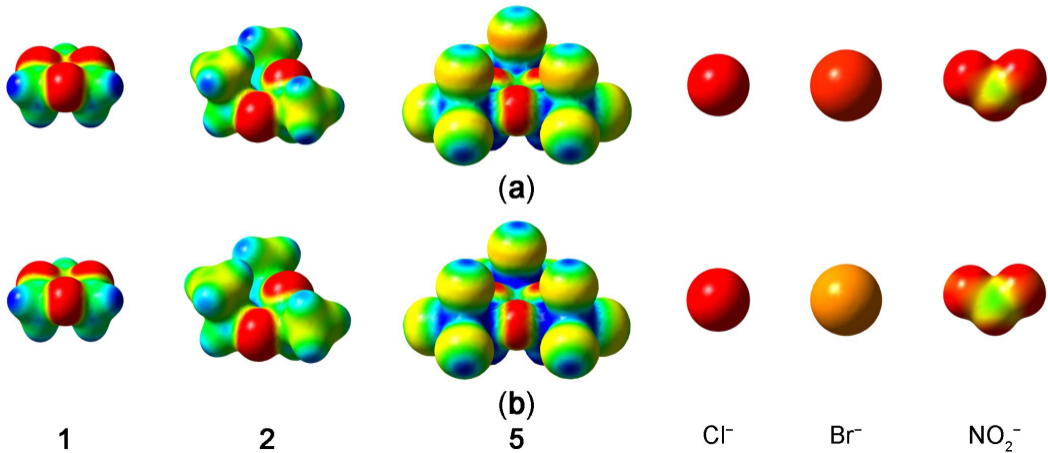

Supplement: d1nj03320d6.pdf [file d1nj03320d6.pdf]

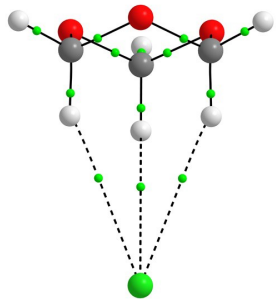

1...Cl<sup>-</sup>

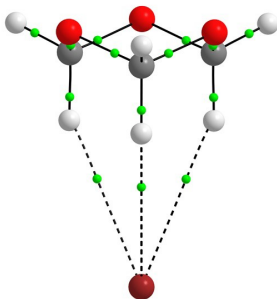

1...Br<sup>-</sup>

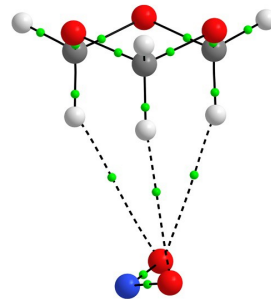

1...NO<sub>2</sub><sup>-</sup>

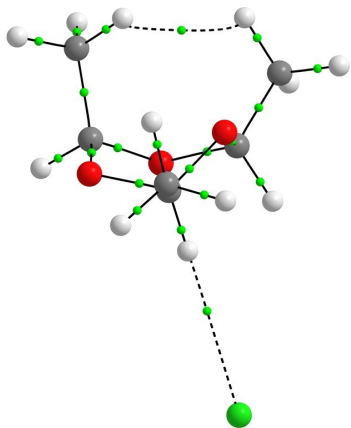

2...Cl<sup>-</sup>

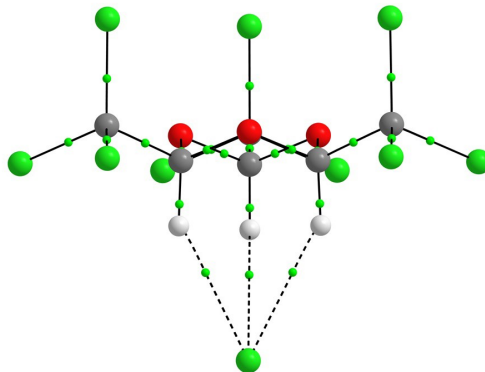

5...Cl<sup>-</sup>

Supplement: d1nj03320d7.pdf [file d1nj03320d7.pdf]

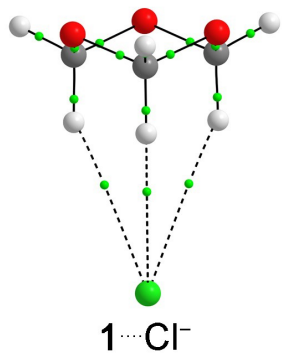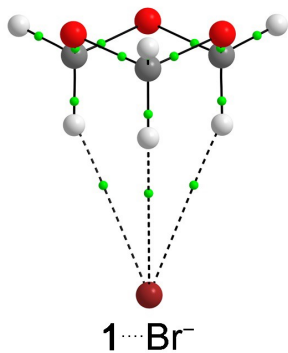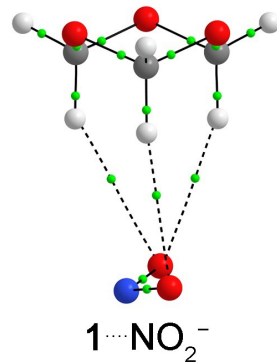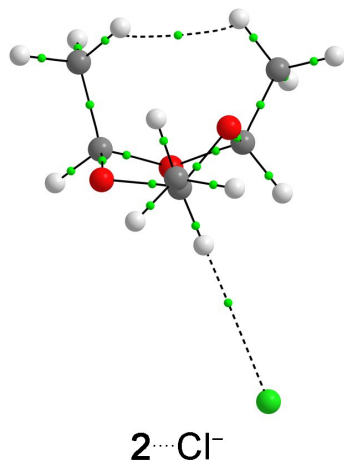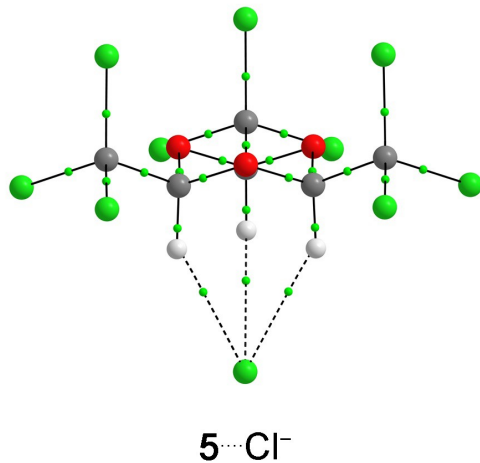

Supplement: d1nj03320d8.pdf [file d1nj03320d8.pdf]
